1 Regulation of *CYP94B1* by WRKY33 controls apoplastic barrier formation in  
2 the roots leading to salt tolerance

3

4 Pannaga Krishnamurthy<sup>1,2</sup>, Bhushan Vishal<sup>1#</sup>, Wan Jing Ho, Felicia Chien Joo Lok, Felicia  
5 Si Min Lee and Prakash P Kumar<sup>1,2\*</sup>

6 <sup>1</sup> Department of Biological Sciences, National University of Singapore, 14 Science Drive 4,  
7 Singapore 117543

8 <sup>2</sup> NUS Environmental Research Institute (NERI), National University of Singapore, #02-01,  
9 T-Lab Building, 5A Engineering Drive 1, Singapore 117411

10 <sup>#</sup>Current address: School of Biological Sciences, Nanyang Technological University,  
11 Singapore 637551

12

13 \* Corresponding author

14 Address: Department of Biological Sciences, National University of Singapore, 14 Science  
15 Drive 4, Singapore 117543

16 Tel: +65-65162859

17 Fax: +65-67792486

18 email: [dbskumar@nus.edu.sg](mailto:dbskumar@nus.edu.sg)

19

20 **List of authors contributions:**

21 P.K. and P.P.K. conceived the research plans; P.K., H.W.J, F.L.C.J and F.L performed most  
22 of the experiments; B.V carried out rice experiments and GC-MS/MS analysis; P.K. designed  
23 the experiments, analyzed the data and wrote the article with contributions of all the authors.

24

25 Short title : WRKY33 regulates apoplastic barrier formation

26 One sentence summary: AtWRKY33 transcription factor regulates *AtCYP94B1* to  
27 increase plant salt tolerance by enhanced suberin deposition in  
28 the endodermal cells of *Arabidopsis* roots

29 Total word count : 7303 (Introduction, results, discussion and Methods)

30 **Abstract**

31 Salinity is an environmental stress that causes decline in crop yield. *Avicennia officinalis* and  
32 other mangroves have adaptations such as ultrafiltration at the roots aided by apoplastic cell-  
33 wall barriers to thrive in saline conditions. We studied a Cytochrome P450 gene, *AoCYP94B1*  
34 from *A. officinalis* and its *Arabidopsis* ortholog *AtCYP94B1* that are involved in apoplastic  
35 barrier formation, and are induced by 30 minutes of salt treatment in the roots. Heterologous  
36 expression of *AoCYP94B1* in *atcyp94b1 Arabidopsis* mutant and wild-type rice conferred  
37 increased NaCl tolerance to seedlings by enhancing root suberin deposition. Histochemical  
38 staining and GC-MS/MS quantification of suberin precursors confirmed the role of CYP94B1  
39 in suberin biosynthesis. Using chromatin immunoprecipitation, yeast one-hybrid and  
40 luciferase assays, we identified AtWRKY33 as the upstream regulator of *AtCYP94B1* in  
41 *Arabidopsis*. In addition, *atwrky33* mutants exhibited reduced suberin and salt sensitive  
42 phenotypes, which were rescued by expressing *35S::AtCYP94B1* in *atwrky33* mutant. This  
43 further confirms that the regulation of *AtCYP94B1* by AtWRKY33 is part of the salt tolerance  
44 mechanism, and our findings can help in generating salt tolerant crops.

45

46 **Key words:** salt tolerance, mangrove, CYP94B1, WRKY33, ChIP, Casparian strip, suberin  
47 lamellae, apoplastic barriers

48

## 49 **Introduction**

50 Salinity is a major environmental stress factor that leads to reduced crop productivity. The  
51 progressive increase in soil salinization exacerbates the already damaging effect of steady  
52 reduction in the area of arable land worldwide (Parida and Das, 2005; Agarwal et al., 2014).  
53 Na<sup>+</sup> is the major toxic ion found in high saline soils, which imparts osmotic as well as ionic  
54 stresses. It is imperative to limit the entry of excess Na<sup>+</sup> into plant cells in order to maintain  
55 proper ion homeostasis, and normal metabolism. Mangroves have evolved various adaptive  
56 strategies to flourish under high saline conditions. One of the important adaptations exhibited  
57 by most plants, and to a greater extent by mangroves, is ultrafiltration at the roots by the  
58 presence of apoplastic barriers in the roots (Scholander, 1968). In an earlier study, we have  
59 shown that a salt secretor mangrove, *A. officinalis* restricts 90-95 % salt at the roots due to the  
60 presence of enhanced apoplastic barriers (Krishnamurthy et al., 2014).

61 The main apoplastic diffusion barriers in roots are: epidermis, which is the outermost layer of  
62 young roots, endodermis surrounding the vasculature of young roots and peridermis which  
63 replaces both epidermis and endodermis in the older roots upon secondary thickening  
64 (Nawrath et al., 2013; Wunderling et al., 2018). These apoplastic barriers mainly consisting  
65 of Casparian strips (CSs) and suberin lamellae (SL) block the apoplastic and coupled  
66 transcellular leakage of ions and water into the xylem, which is the major path of Na<sup>+</sup> uptake  
67 (Yeo et al., 1987; Ma and Peterson, 2003; Krishnamurthy et al., 2011; Kronzucker and Britto,  
68 2011; Schreiber and Franke, 2011; Andersen et al., 2015; Barberon et al., 2016). While CSs  
69 are formed as radial wall thickenings, SL are secondary wall thickenings on the inner face of  
70 primary cell-walls (Schreiber et al., 1999; Naseer et al., 2012). Chemically, CSs are made up  
71 of mainly lignin and SL are made up of suberin and/or lignin depositions (Schreiber et al.,  
72 1999; Naseer et al., 2012). Together, these barriers function in biotic and abiotic stress  
73 responses (Enstone et al., 2003; Krishnamurthy et al., 2009; Chen et al., 2011; Schreiber and  
74 Franke, 2011; Ranathunge et al., 2011a). Suberin is a biopolymer consisting of aliphatic and  
75 aromatic domains, with the aliphatic domain contributing mainly to its barrier properties  
76 (Kolattukudy, 1984; Schreiber et al., 1999; Ranathunge and Schreiber, 2011b). Suberin  
77 biosynthesis is a complex pathway involving elongases, hydroxylases and peroxidases  
78 (Bernards et al., 2004; Franke et al., 2005; Hofer et al., 2008; Franke et al., 2009).  
79 Cytochrome P450s (CYPs) are one of the largest super-families of peroxidases that are well  
80 characterized and known to carry out  $\omega$ -hydroxylation of the aliphatic constituent of suberin,  
81 namely,  $\omega$ -hydroxy acids (Hofer et al., 2008; Compagnon et al., 2009; Pinot and Beisson,

82 2011). Most of the CYPs that act on fatty acids belong to *CYP86* and *CYP94* subfamilies  
83 (Pinot and Beisson, 2011). Some of the CYPs, such as *CYP86A1*, *CYP94A1*, *CYP94A2* and  
84 *CYP94A5* have been identified as  $\omega$ -hydroxylases (Franke and Schreiber, 2007; Hofer et al.,  
85 2008). Although the role of *CYP94B* subfamily in initial  $\omega$ -oxidation of JA-Ile to 12OH-JA-  
86 Ile affecting the JA signaling was known (Koo et al., 2014; Bruckhoff et al., 2016), their role  
87 in suberin biosynthesis has not been explored so far and it would be desirable to examine the  
88 correlation between *CYP94B* members and root barrier formation.

89 There is limited information on the molecular mechanisms controlling the genes that regulate  
90 suberin biosynthesis. Overexpression of *MYB41* showed increase in suberin biosynthesis as  
91 well as expression of some *CYP86* subfamily genes (Kosma et al., 2014). Recently, MYB39  
92 was shown to regulate suberin deposition (Cohen et al., 2020). In addition, the promoter  
93 regions of *CYP83* and *CYP71* subfamilies have the W-box, a WRKY transcription factor (TF)  
94 binding domain (Xu et al., 2004; Birkenbihl et al., 2017). However, to the best of our  
95 knowledge, identities of transcription factor(s) that regulate *CYP94B* subfamily genes is  
96 unknown.

97 In the current study, we have identified and functionally characterized a *CYP94B* subfamily  
98 gene, *AoCYP94B1* from *A. officinalis* and its *Arabidopsis* ortholog *AtCYP94B1*. The  
99 expression of these genes is induced by salt treatment. We also show that heterologous  
100 expression of *AoCYP94B1* increased the salt tolerance and root suberin deposition in  
101 *Arabidopsis* and rice seedlings. Histochemical staining was carried out to visualize root  
102 suberin, and quantification of suberin precursors in the *atcyp94b1* mutant was done by gas  
103 chromatography and mass spectrometry (GC-MS/MS). Using mutant analysis, chromatin  
104 immunoprecipitation, yeast one-hybrid, and luciferase assays, we demonstrate that  
105 *AtWRKY33* regulates *AtCYP94B1*. Additionally, rescue of the reduced suberin and salt  
106 sensitive phenotype was demonstrated by expressing *35S::AtCYP94B1* in *atwrky33* mutant.  
107 Collectively, the data presented helped to identify the molecular regulatory mechanism  
108 involving apoplastic barrier formation through *CYP94B1*, which can be used as an important  
109 strategy for generating salt tolerant crops.

110

## 111 **Results**

### 112 **Identification of *AoCYP94B1*, a *CYP94B* subfamily member from *A. officinalis* as a salt-** 113 **induced gene**

114 Several cytochrome P450 genes in the *CYP94B* subfamily such as, *AoCYP94B1* and  
115 *AoCYP94B3* were identified in our earlier transcriptomic study of *A. officinalis* roots  
116 (Krishnamurthy et al., 2017). Since some reports (Benveniste et al., 2006) suggest a role for  
117 this subfamily genes in  $\omega$ -hydroxylation, an important step in suberin biosynthesis, we chose  
118 *AoCYP94B1* for further characterization. A phylogenetic tree was constructed based on the  
119 derived amino acid sequence of *AoCYP94B1* with other members of this subfamily  
120 (Supplemental Figure S1A). Rice *OsCYP94B3* and *Arabidopsis* *AtCYP94B1* were among  
121 the homologs that share high level of sequence similarity with *AoCYP94B1*. *AoCYP94B1*  
122 showed 60 % identity and 74 % similarity with *AtCYP94B1*, and 60 % identity and 71 %  
123 similarity with *OsCYP94B3*. The Cytochrome P450 cysteine heme-iron ligand signature  
124 motif was conserved across various plant species (Supplemental Figure S1B).

125 In *A. officinalis* seedlings without salt treatment, the *AoCYP94B1* transcripts were  
126 constitutively expressed in all tissues, but higher level of expression was observed in the  
127 leaves and stems compared to roots (Figure 1A). The transcript levels in the roots increased  
128 18-fold with 30 min of NaCl treatment and declined thereafter over 48 h (Figure 1B). In the  
129 leaves, 14-fold increase was seen after 4 h of NaCl treatment (Figure 1B). In a parallel  
130 exploratory study, the *Arabidopsis* ortholog, *AtCYP94B1* showed somewhat comparable  
131 expression pattern in all the tissues tested except for the flowers where it was ~7-fold higher  
132 (Figure 1C). The transcript level of *AtCYP94B1* was induced (~4-fold) by 30 min of salt  
133 treatment in the roots and remained high up to 6 h. Whereas in leaves, the expression peaked  
134 to ~4-fold after 6 h of salt treatment (Figure 1D). Mimicking the qRT-PCR expression  
135 profile, the *pAtCYP94B1::GUS* expression was found in all the tissues (Figure 1E, F) and was  
136 increased by 30 min upon salt treatment in the roots (Supplemental Figure S2A). While the  
137 *pAtCYP94B1::GUS* expression was mainly seen in the stele of the control roots, the  
138 expression significantly increased (~3-fold) in salt-treated roots and was mainly found in the  
139 endodermis (Figure G and inset to G). Similarly, upon salt treatment, the translational  
140 *pAtCYP94B1::AtCYP94B1-GFP* (Figure 1H, I) fusion localized to endodermal cells where  
141 apoplastic barriers are formed.

142 **Heterologous expression of *AoCYP94B1* increases salt tolerance in *Arabidopsis* and rice**  
143 **seedlings**

144 In order to functionally characterize the *AoCYP94B1*, it was heterologously expressed in the  
145 *atcyp94b1 Arabidopsis* T-DNA insertional mutant background. There was a reduction in  
146 seedling root growth of all the genotypes tested under salt treatment. However, *atcyp94b1*  
147 mutants showed about 53% and 76% reduction in root growth upon 50 and 75 mM NaCl  
148 treatment, respectively compared to their untreated counterparts (Figure 2A, B). Whereas  
149 under similar salt conditions, all the *35S::AoCYP94B1* lines tested grew better than the  
150 *atcyp94b1* mutant and WT (34% and 52% growth reduction ) with lines 1, 2 and 3 showing  
151 28%, 21%, 17% reduction at 50mM and 43%, 43% and 40% reduction at 75mM,  
152 respectively (Figure 2A, B). These data suggest that introduction of *35S::AoCYP94B1* into  
153 *atcyp94b1* mutant increased its salt tolerance. **In addition, salt sensitivity of 4-week-old plants**  
154 **grown in the soil was checked to see if similar salt response is seen in older plants. Under**  
155 **untreated conditions, there was no difference in the growth of different genotypes. Upon**  
156 **NaCl treatment, *35S::AoCYP94B1* plants displayed better growth compared to the *atcyp94b1***  
157 **plants (Figure 3A and Supplemental Figure S2B). Yellowing and drying of *atcyp94b1* leaves**  
158 **could be seen and they could not recover to the extent of WT and *35S::AoCYP94B1* lines**  
159 **after the stress was withdrawn. While more than 80% of the WT and *35S::AoCYP94B1* lines**  
160 **showed survival (with more green and healthy leaves) after recovery growth, only 33% of**  
161 ***atcyp94b1* plants could survive the treatment (Figure 3B). There was no significant difference**  
162 **in the leaf area among the genotypes, although a reduction in effective leaf area could be seen**  
163 **due to curling up of leaves upon salt treatment in all the genotypes (Figure 3C). Other growth**  
164 **parameters such as chlorophyll content and FW/DW were measured and found to be**  
165 **generally reduced in all the genotypes upon salt treatment. While *atcyp94b1* mutants showed**  
166 **3- and 4.5-fold reduction in chlorophyll content and FW/DW ratio respectively, these**  
167 **reductions occurred to a lesser extent (~1.5-fold) in WT and *35S::AoCYP94B1* lines (Figure**  
168 **3D, E). These observations suggest that introduction of *35S::AoCYP94B1* into *atcyp94b1***  
169 **mutant rescues its salt sensitive phenotype even in the older plants.**

170 We measured the total Na<sup>+</sup> and K<sup>+</sup> ion contents in the leaves and roots of WT, mutant and  
171 *35S::AoCYP94B1* plants under untreated and salt-treated (100 mM NaCl for 2 days)  
172 conditions in order to understand the ion accumulation and distribution. There were no  
173 differences in the ion contents among the WT and transgenic lines in the absence of salt  
174 treatment. Upon NaCl treatment, the amount of Na<sup>+</sup> increased from 1 to 38 mg/g DW in the

175 leaves of *atcyp94b1* mutants, while in the *35S::AoCYP94B1* leaves, the amount was  
176 significantly lower (6, 8 and 7 mg/g DW in lines 1, 2 and 3, respectively) (Figure 3F). No  
177 significant differences were observed in the Na<sup>+</sup> and K<sup>+</sup> concentrations within the roots of the  
178 different genotypes tested (Figure 3F, G). These data indicate that the *35S::AoCYP94B1* lines  
179 efficiently control endogenous Na<sup>+</sup> accumulation.

180 Based on the observation that heterologous expression of *35S::AoCYP94B1* in *Arabidopsis*  
181 conferred increased salt tolerance, we expressed *pUBI::AoCYP94B1* in rice to examine if a  
182 similar increase in salt tolerance could be conferred to the model crop species. There was no  
183 difference in the growth of WT and *pUbi::AoCYP94B1* seedlings under untreated conditions  
184 (Figure 4A, B). However, the *pUbi::AoCYP94B1* rice seedlings showed significantly higher  
185 shoot and root growth than the WT after 3 and 6 days of 100 mM NaCl treatment on MS agar  
186 plates (Figure 4C, D). Although growing the young seedlings is convenient on MS medium,  
187 we sought to test the rice plants under hydroponic culture conditions normally used to  
188 simulate its natural growing environment. On salt treatment for 21 d, the hydroponically-  
189 grown one-month-old *pUbi::AoCYP94B1* seedlings showed about 35 % higher survival rate  
190 compared to the WT (Figure 4E, F). This further demonstrates that *AoCYP94B1* plays an  
191 important role in salt tolerance and could serve as an important candidate for improving salt  
192 tolerance of crops.

193 In order to gain further insights into the underlying molecular mode of action, we chose to  
194 work with the *Arabidopsis* ortholog. This would permit more detailed biochemical and  
195 molecular genetic analyses to be performed, which would not be feasible with *Avicennia*, a  
196 perennial tree species that is not amenable to genetic transformation.

### 197 ***AtCYP94B1* increases salt tolerance as well as suberin lamellae (SL) formation in** 198 ***Arabidopsis* roots**

199 Similar to the *AoCYP94B1* heterologous expression lines, *pAtCYP94B1::AtCYP94B1*  
200 complementation lines showed better seedling root growth compared to the *atcyp94b1*  
201 mutants when subjected to 50 and 75 mM NaCl treatment (Figure 5A-D). The salt sensitivity  
202 phenotype of *atcyp94b1* mutants was rescued in the *pAtCYP94B1::AtCYP94B1*  
203 complementation lines. Analysis was carried out in three *pAtCYP94B1::AtCYP94B1*  
204 complementation lines and two representative lines are shown in Figure 5A-C. However,  
205 mannitol treatment, as an alternate abiotic stress, did not cause significant changes to the  
206 seedling root growth in any of these genotypes (Supplemental Figure S3).



207 In view of the suggested role for *CYP94B* family genes in suberin biosynthesis, combined  
208 with our observation of reduced  $\text{Na}^+$  accumulation in the shoots of *35S::AoCYP94B1* lines,  
209 we carried out GC-MS/MS quantification of several aliphatic components of the root suberin  
210 monomers in WT, *atcyp94b1* mutant, *pAtCYP94B1::AtCYP94B1* complementation lines and  
211 *35S::AoCYP94B1* heterologous expression lines. The *atcyp94b1* mutant showed a significant  
212 reduction in the amount of  $\omega$ -hydroxy acids and  $\alpha$ ,  $\omega$ -dicarboxylic acid compared to the other  
213 genotypes tested (Figure 5E). No significant differences in the amounts of p-coumaric acid,  
214 **C-18 octadecanoic acid** and C-22 docosanol was found between the genotypes tested. While  
215 *atcyp94b1* mutant showed ~50 % reduction in the amounts of alcohols (C-18 octadecanol and  
216 C-20 eicosanol),  $\omega$ -hydroxy acids (C-16 and C-22) and C-16  $\alpha$ ,  $\omega$ -dicarboxylic acid (Figure  
217 5E), the amounts were restored to the WT levels in *pAtCYP94B1::AtCYP94B1*  
218 complementation lines. **The increase seen in *35S::AoCYP94B1* lines was higher compared to**  
219 **that of the WT, which could be either due to the strength of 35S promoter or because**  
220 ***AoCYP94B1* functions much more efficiently.** Similarly, significantly higher amounts of C-  
221 16  $\omega$ -hydroxy acid and C-16  $\alpha$ ,  $\omega$ -dicarboxylic acid were present in *35S::AoCYP94B1* line  
222 compared to WT indicating a role for CYP94B1 in their biosynthesis. All the standards  
223 quantified for this study are shown in the chromatogram in Figure 5F.

224 Further, to visualize the altered suberin deposition in the roots, we carried out root  
225 histochemical studies in WT, *atcyp94b1* mutant, *pAtCYP94B1::AtCYP94B1*  
226 complementation lines and *35S::AoCYP94B1* heterologous expression lines. There was no  
227 difference in the deposition of root CSs among the genotypes (Figure 6B). However, there  
228 was a significant reduction in the deposition of suberin in the endodermal cell walls of  
229 *atcyp94b1* compared to WT, *pAtCYP94B1::AtCYP94B1* and *35S::AoCYP94B1* roots. While  
230 SL was found in ~70 % of the endodermal cells in WT, *pAtCYP94B1::AtCYP94B1* and  
231 *35S::AoCYP94B1*, only 20 % of the cells exhibited SL in *atcyp94b1* mutant (Figure 6C-E). **In**  
232 **the patchy zones of *35S::AoCYP94B1\_1* roots, a** significantly higher number of endodermal  
233 cells with suberin were seen (Figure 6C, E). Furthermore, we examined the uptake of  
234 fluorescein diacetate (FDA), which was used as a tracer to check the barrier properties of SL  
235 previously (Barberon et al., 2016). In the undifferentiated (CSs not formed) and non-  
236 suberized (well-formed CSs) zones of the roots of all the genotypes checked, after 1 min of  
237 incubation, FDA could enter all the endodermis (100 %) as well as the pericycle cells  
238 **(Supplemental Figure S4A-D).** However, in the suberized zones of the roots, FDA could  
239 penetrate only ~10 % of endodermal cells in WT, *pAtCYP94B1::AtCYP94B1* and



240 *35S::AoCYP94B1*, while it entered ~80 % of *atcyp94b1* endodermal cells (Figure 5F, G). In  
241 addition, to check if the enhanced salt tolerance in rice is brought about by a similar  
242 mechanism of action, namely, increased SL deposition as seen in *Arabidopsis*, we examined  
243 the salt-treated roots of WT and *pUbi::AoCYP94B1* rice lines. In the apical regions, SL were  
244 visible in a higher number of endodermal cells of *pUbi::AoCYP94B1* than in the WT. In the  
245 mid regions, SL were clearly visible in *pUbi::AoCYP94B1* while several endodermal cells  
246 lacked SL in the WT. In the basal regions, prominent SL were present in all the endodermal  
247 cells of *pUbi::AoCYP94B1*, while many passage cells without SL were evident in the WT  
248 (Supplemental Figure S5A vs. B). The SL deposition showed a similar trend in the exodermal  
249 layer as in the endodermis (Supplemental Figure S5C vs. D). These results not only suggest  
250 that *AtCYP94B1* has a critical role in the formation of SL as the apoplastic barrier leading to  
251 salt tolerance, but also that *AoCYP94B1* could function similar to its *Arabidopsis* ortholog.  
252 Therefore, the use of *AtCYP94B1* for further understanding of its molecular regulatory  
253 mechanism can be justified.

#### 254 **Identification of AtWRKY33 transcription factor as the upstream regulator of** 255 ***AtCYP94B1***

256 We sought to identify the upstream regulator of *AtCYP94B1* in *Arabidopsis* after establishing  
257 the fact that *AoCYP94B1* and *AtCYP94B1* function in a similar manner to regulate root  
258 apoplastic barrier formation leading to salt tolerance. Analysis of the 5'-upstream region of  
259 *AtCYP94B1* showed various abiotic stress-related *cis*-elements such as WRKY, MYB and  
260 MYC transcription factor binding domains, and especially, an enrichment of WRKY binding  
261 domains (Supplemental Figure S6A). Coincidentally, in our earlier transcriptomic study,  
262 WRKYs (e.g., AoWRKY6, AoWRKY9, AoWRKY33) were one of the major groups of TFs  
263 upregulated upon salt treatment in the roots of *A. officinalis* (Krishnamurthy et al., 2017).  
264 Because the role of WRKY33 in salt tolerance of plants has emerged in several studies, we  
265 selected AtWRKY33 which shares high sequence similarity to AoWRKY33, (Supplemental  
266 Figures S7 A, B) for our further study. Also, we used WRKY6 and WRKY9 that belong to  
267 Group I in ChIP and Y1H assays to ensure that the interaction and regulation is specific to  
268 WRKY33 (Group I WRKY). We carried out qRT-PCR analysis to check if *AtWRKY33* was  
269 induced by salt treatment in a similar manner as *AtCYP94B1*. Under untreated control  
270 conditions, we observed that *AtWRKY33* expression was comparable across tissue samples  
271 (Figure 7A). In contrast, as was seen for *AtCYP94B1* earlier, expression levels of *AtWRKY33*  
272 increased by 30 min of salt treatment in the roots and remained high (4-fold after 3 h) up to 6

273 h (Figure 7B). Similarly, in leaves, *AtWRKY33* expression increased 5-fold with 30 min of  
274 salt treatment (Figure 7B). Furthermore, similar to the qRT-PCR expression profile, the  
275 *pAtWRKY33::GUS* expression was seen in all the tissues in untreated seedlings  
276 (Supplemental Figure S8) and increased upon 50 mM NaCl treatment in the roots (Figure 7C,  
277 D). Surprisingly, the *pAtWRKY33::GUS* was mainly expressed in salt-treated *Arabidopsis*  
278 root endodermal cells (Figure 7E) similar to *AtCYP94B1* expression.

279 To experimentally validate whether *AtWRKY33* regulates *AtCYP94B1*, the expression level  
280 of *AtCYP94B1* was quantified in *atwrky33* mutants. *AtCYP94B1* transcript levels decreased  
281 by 14-fold in *atwrky33* mutants (Figure 7F). In addition, ChIP-qPCR analysis was performed  
282 to check for WRKY interaction with *AtCYP94B1* promoter fragment. Consistent with the  
283 presence of putative WRKY-binding *cis*-elements, over tenfold enrichment of *AtCYP94B1*  
284 promoter fragment was observed in *AtWRKY33*-HA pulldown samples (Figure 7G).  
285 *AtWRKY6*-HA and *AtWRKY9*-HA pulldown was also carried out to check if the interaction  
286 was specific to *AtWRKY33*, and we found that there was no significant enrichment of  
287 *AtCYP94B1* promoter fragments in these pulldown samples. We independently verified the  
288 interaction of *AtWRKY33*, *AtWRKY6* and *AtWRKY9* with the promoter fragment of  
289 *AtCYP94B1* using the Y1HGold system (Clontech USA). After introduction of *pGADT7*  
290 *AtWRKY33*, *AtWRKY6* and *AtWRKY9* plasmids into the Y1HGold cells harboring  
291 *AtCYP94B1* promoter fragment, *AtWRKY33* grew better than its control in the presence of  
292 Aureobasidin A (100 ng ml<sup>-1</sup>), indicating an interaction between *AtWRKY33* and the  
293 promoter of *AtCYP94B1* (Figure 7H). While *AtWRKY6* did not show any better growth  
294 compared to the control, there was very weak interaction with *AtWRKY9* (Figure 7H).  
295 Additionally, luciferase assay using *atwrky33 Arabidopsis* mutant protoplasts was carried out  
296 to check the *in vivo* transcriptional activation of *AtCYP94B1* promoter by *AtWRKY33*.  
297 Protoplasts transfected with *pAtCYP94B1::LUC* along with *35S::AtWRKY33* showed ~3-fold  
298 higher luminescence compared to the ones transfected with the control, *pAtCYP94B1::LUC*  
299 (Figure 7I). The mutant *pAtCYP94B1::LUC* (with two WRKY binding sites mutated) showed  
300 only ~1.5-fold higher luminescence compared to the control indicating that the mutation in  
301 the TF binding sites indeed affects the promoter activity. Collectively, these results show that  
302 *AtWRKY33* TF acts as the upstream regulator of *AtCYP94B1* gene.

303 If the identified *WRKY33* is indeed the upstream regulator of *AtCYP94B1 in vivo*, root  
304 apoplastic barrier deposition in the *atwrky33* mutants should be impaired and expression of  
305 *35S::AtCYP94B1* in *atwrky33* mutant should rescue this phenotype. There were no visible

306 differences in the formation of CSs in the *atwrky33* mutants compared to WT and  
307 *35S::AtCYP94B1 atwrky33* roots (Figure 8A). However, suberin deposition was reduced in  
308 the roots of *atwrky33* compared to the WT and *35S::AtCYP94B1 atwrky33* (Figure 8B).  
309 While ~70 % of WT and 60 % of *35S::AtCYP94B1 atwrky33* endodermal cells showed SL  
310 deposition, only 25 % of the corresponding *atwrky33* cells exhibited SL deposition (Figure  
311 8C). Further, the *atwrky33* mutant seedlings showed salt sensitivity similar to that shown by  
312 *atcyp94b1* mutants. However, this sensitivity was rescued when *35S::AtCYP94B1* was  
313 expressed in *atwrky33* mutant background (Figure 8D). These results strongly support our  
314 proposed working model where AtWRKY33 regulates root apoplastic barrier formation via  
315 *AtCYP94B1* to confer enhanced salt tolerance in plants (Figure 8E).

316

## 317 **Discussion**

318 It is imperative for researchers to understand the mechanisms underlying salt tolerance and  
319 generate salt tolerant crops in order to meet the increasing demand for food to support the  
320 predicted population growth. Various studies have shown that apoplastic barrier (mainly CSs  
321 and SL) deposition in the root endodermis and exodermis is critical in order to prevent  
322 unwanted loading of ions into the xylem (Krishnamurthy et al., 2011; Schreiber and Franke,  
323 2011; Nawrath et al., 2013; Graca, 2015; Barberon, 2017; Kreszies et al., 2018). Although it  
324 is known that mangroves possess highly efficient apoplastic barrier deposition  
325 (Krishnamurthy et al., 2014), the underlying molecular mechanism was not understood  
326 previously. The potential to learn from such adaptive mechanisms to devise strategies for  
327 crop improvement has been highlighted, but that is yet to be accomplished. The present study  
328 represents a successful example of discovering and applying such mechanistic knowledge.

329 To understand the role of CYP94B1 in salt stress response, we have used three plant species  
330 (*A. officinalis*, *Arabidopsis* and rice) of varying ages. Our earlier transcriptomic study  
331 involving *A. officinalis* which led to the identification of *AoCYP94B1*, was carried out using  
332 2-month-old seedlings treated with 500 mM NaCl. Therefore, similar conditions were used  
333 for *A. officinalis* in the current study. Experiments in *Arabidopsis* were carried out using the  
334 **young seedlings (one-week-old) and older (4-week-old) plants** in order to understand their  
335 response to salt in two developmental stages. While 50 mM NaCl was used for most of the  
336 studies with younger seedlings as this did not damage the roots, 100 mM NaCl was used to  
337 challenge the older plants. Similarly, two developmental stages (one- week-old and 4-week-  
338 old) of rice plants were used for our studies.

339 Our findings have highlighted the role of *AtCYP94B1* from *Arabidopsis* in salinity tolerance  
340 response. This gene was identified as the ortholog of *AoCYP94B1* based on our studies with  
341 the mangrove tree, *A. officinalis*, which suggests that they may play similar roles in the two  
342 species. Under untreated conditions, the expression of *AtCYP94B1* was the lowest in roots  
343 while it was predominant in flowers (Figure 1D). Similar expression profile of *AtCYP94B1*  
344 was reported in earlier studies (Bruckhoff et al., 2016; Widemann et al., 2016). **However,**  
345 **according to BAR eFP Browser, the highest expression is found in petioles of mature leaves.**  
346 Also, *AtCYP94B1* gene family was shown to regulate flowering time but not the fertility  
347 (Bruckhoff et al., 2016), while overexpression of *AtCYP94B3* led to partial loss of male  
348 sterility in *Arabidopsis* (Koo et al., 2011). However, in our study, ~4-fold upregulation of  
349 *AtCYP94B1* seen in the roots upon salt treatment (Figure 1D) along with its expression and

350 localization to the endodermis (Figure 1G- I) clearly indicates its key function in root  
351 endodermis under salt stress. While *AoCYP94B1* showed highest expression at 0.5 h after salt  
352 treatment, *AtCYP94B1* expression remained high from 0.5 h to 6 h. At this point, we are not  
353 sure if this difference is a reflection of inherent differences between two species or due to  
354 other reasons.

355 Earlier studies have suggested that CYP94B family genes, including *AtCYP94B1*, play a role  
356 in sequential  $\omega$ -oxidation of JA-Ile to 12OH-JA-Ile (Koo et al., 2014; Aubert et al., 2015;  
357 Lunde et al., 2019) particularly after flower opening (Bruckhoff et al., 2016; Widemann et al.,  
358 2016). The authors also had highlighted that a role for this CYP94 subfamily members in  
359 metabolism of other substrates cannot be dismissed. Furthermore, in an earlier study,  
360 *Arabidopsis* CYP94B1, expressed in yeast was shown to carry out  $\omega$ -hydroxylation of fatty  
361 acids with chain lengths of C12 - C18 (Benveniste et al., 2006). Accordingly, our  
362 observation that the reduction in the concentration of aliphatic suberin monomers (C-16 and  
363 C-22  $\omega$ -hydroxyacids) in the roots of *atcyp94b1* mutants compared to the WT,  
364 complementation and heterologous expression lines (Figure 5E) confirms the role of  
365 CYP94B1 in biosynthesis of aliphatic suberin monomers, leading to the formation of  
366 apoplastic barriers in the roots. The induction of *CYP94B1* gene expression by salt treatment  
367 in *Arabidopsis* and *A. officinalis* (Figure 1), coupled with the observation of reduced  
368 apoplastic barrier formation in the root endodermis (Figure 6) as well as salt sensitivity in the  
369 *atcyp94b1* mutant (Figures 2-4) collectively show that *AtCYP94B1* plays a role in salinity  
370 response. The fact that the salt sensitive phenotype along with reduced amount of suberin in  
371 the endodermis of *atcyp94b1* mutant are rescued in the transgenic *Arabidopsis* lines  
372 (*35S::AoCYP94B1* and *pAtCYP94B1::AtCYP94B1*) further confirm the role of CYP94B1 in  
373 salt tolerance via suberin deposition. It is also clear from our data that the suberin lamellae in  
374 the endodermal cell walls are functional in blocking the apoplastic flow (Figure 6F) and  
375 thereby limiting the uptake of excess  $\text{Na}^+$  into the shoots (Figure 3F). Several prior studies  
376 have shown similar increases in the concentration of aliphatic suberin monomers in response  
377 to salt stress which limits the root apoplastic bypass flow (Ranathunge et al., 2005;  
378 Ranathunge et al., 2008; Krishnamurthy et al., 2009; Krishnamurthy et al., 2011; Ranathunge  
379 et al., 2011a; Krishnamurthy et al., 2014). The increased salt tolerance exhibited by the  
380 heterologous expression lines (*35S::AoCYP94B1*) of rice (Figure 4) and *Arabidopsis* (Figure  
381 2, 3) was directly correlated with increased apoplastic barrier formation in the roots (Figures  
382 5, 6, Supplemental Figure S5), suggesting that the mangrove *AoCYP94B1* could be used to

383 confer enhanced salt tolerance to crop plants. It has also been shown that JA-Ile degradation /  
384 oxidation occurs under salt stress (Hazman et al., 2019) and this leads to increased salinity  
385 tolerance in rice (Kurotani et al., 2015). Therefore, the role of this pathway in contributing to  
386 salt tolerance in our overexpression lines cannot be dismissed and demands further studies to  
387 understand the relationship between JA catabolism and suberin biosynthesis under salt stress.

388 Suberin deposition not only occurs in response to abiotic stresses such as salinity, drought  
389 (Ranathunge et al., 2011c; Franke et al., 2012), but also to biotic stresses where it serves to  
390 block pathogen entry through the cell walls (Ranathunge et al., 2008). Despite their pivotal  
391 role in conferring tolerance to multiple stresses, information on molecular regulation of  
392 apoplastic barrier formation is still scarce. So far, some of the MYB TFs have been shown to  
393 regulate CS development (Kosma et al., 2014; Kamiya et al., 2015; Li et al., 2018) and  
394 suberin biosynthesis (Gou et al., 2017) by regulating *CYP86* subfamily genes. To the best of  
395 our knowledge, no prior report on regulation of *CYP94B* subfamily genes exists. Salt-  
396 mediated co-induction of *AtWRKY33* (Figure. 7B-D) along with *AtCYP94B1* (Figure 1D) and  
397 the endodermal expression of both *pAtCYP94B1::GUS* and *pATWRKY33::GUS* in the salt-  
398 treated roots (Figures 1, 7) suggests that they both play a related role under salt treatment.  
399 This, combined with enrichment of *AtCYP94B1* promoter fragments in our ChIP-qPCR, yeast  
400 one-hybrid analysis and luciferase assay (Figure 7) clearly show that *AtWRKY33* is the  
401 upstream regulator of *AtCYP94B1*. WRKY TFs are known to regulate biotic (Bakshi and  
402 Oelmuller, 2014; Sarris et al., 2015) and abiotic stress responses. (He et al., 2016; Liang et  
403 al., 2017; Bai et al., 2018). Several transcriptomic and microarray studies have shown their  
404 response to salt and drought stresses (Mahalingam et al., 2003; Narusaka et al., 2004;  
405 Krishnamurthy et al., 2011; Okay et al., 2014; Song et al., 2016). Additionally,  
406 overexpression of WRKY25, 33, 41 and 83 caused enhanced salt tolerance (Jiang and  
407 Deyholos, 2009; Chu et al., 2015; Wu et al., 2017), while many others (WRKY46, 54, 68, 70)  
408 play a role in drought tolerance (Chen et al., 2017). However, the mechanism by which these  
409 WRKY TFs confer stress tolerance is not known. Our observations of reduced deposition of  
410 SL in the endodermal cells of *atwrky33* mutants mimicking *atcyp94b1* mutant phenotype  
411 along with the increase in SL deposition in the *35S::AtCYP94B1 atwrky33* lines (Figure 8)  
412 further confirm the regulatory role of *AtWRKY33* transcription factor on *AtCYP94B1*.  
413 Hence, we propose a working model where *WRKY33* regulates root apoplastic barrier  
414 formation by controlling *CYP94B1* leading to increased salt tolerance (Figure 8E).



415 In conclusion, our study reveals a part of an important molecular regulatory mechanism of  
416 suberin deposition that involves the control of *AtCYP94B1* by *AtWRKY33* transcription  
417 factor, leading to increased salt tolerance of *Arabidopsis* seedlings. We further showed that  
418 heterologous expression of *AoCYP94B1* in both *Arabidopsis* and rice seedlings confers salt  
419 tolerance by the same mode of action. Therefore, our study opens new avenues for  
420 engineering salt tolerant crop plants.

## 421 **Materials and Methods**

### 422 **Cloning and generation of transgenic *Arabidopsis* and rice lines**

423 Full-length coding sequence of *AoCYP94B1* (Unigene99608\_All) was obtained from our  
424 earlier transcriptomic study of *A. officinalis* roots (Krishnamurthy et al., 2017). Wild-type  
425 (WT) *Arabidopsis thaliana*, ecotype Columbia-0 along with the T-DNA insertional mutants,  
426 *atcyp94b1* (SALK\_129672) and *atwrky33* (SALK\_064436) were purchased from the  
427 Arabidopsis Biological Resource Center (ABRC) (<http://www.abrc.osu.edu>) (Alonso et al.,  
428 2003). Position of T-DNA insertion sites for *atcyp94b1* and *atwrky33* mutants are shown in  
429 Supplemental Figures S9 and S10, respectively. Genomic DNA from the mutants was  
430 extracted as described previously (Dellaporta et al., 1983). Plants homozygous for the T-  
431 DNA insertion were selected by genotyping with primers designed using the T-DNA primer  
432 design tool (<http://signal.salk.edu/tdnaprimers.2.html>). Also, qRT-PCR was carried out to  
433 check the suppression of the tagged gene expression in mutants (Supplemental Figures S9,  
434 S10). Seeds were collected from only those mutants that showed more than 70 % reduction in  
435 *AtCYP94B1* as well as *AtWRKY33* expression (Supplemental Figures S9C and S10C). For  
436 heterologous expression of *AoCYP94B1* in *Arabidopsis*, coding sequence (CDS) of  
437 *AoCYP94B1* gene was amplified and cloned into pGreen binary vector under 35S promoter.  
438 For construction of translational fusion with GFP and complementation lines of *AtCYP94B1*,  
439 the full-length cassette including promoter, introns and exons of *AtCYP94B1* amplified from  
440 the genomic DNA of *Arabidopsis* was cloned into pGreen-GFP and pGreen binary vectors,  
441 respectively. For promoter GUS expression analysis, 1kb upstream sequences of *AtCYP94B1*  
442 and *AtWRKY33* were amplified from genomic DNA and cloned into pGreen-GUS. All the  
443 constructs generated were individually electroporated into *Agrobacterium tumefaciens* strain  
444 GV3101:pMP90 and introduced into *Arabidopsis* by the floral dip method (Clough and Bent,  
445 1998). Basta-resistant T1 transgenic plants were selected and introduced gene expression was  
446 confirmed by genotyping PCR and qRT-PCR analysis (Supplemental Figure S9D). T3  
447 generation plants were used for all the experiments. For chromatin immunoprecipitation



448 (ChIP) assay, coding sequences of *AtWRKY33* was cloned into pGreen binary vector with  
449 hemagglutinin (HA) fusion tag. For heterologous expression in rice, coding sequence of  
450 *AoCYP94B1* gene was amplified and cloned with compatible restriction into binary vector  
451 pCAMBIA-1300 under corn *UBIQUITIN* promoter. The constructs were introduced into rice  
452 by *Agrobacterium*-mediated transformation (Toki et al., 2006). Homozygous transgenic lines  
453 (3:1 segregation ratio on hygromycin selection) at the T2 generation were selected for further  
454 analysis. All the primers used in the study are listed in Supplemental Table 1.

#### 455 **Plant materials and growth conditions**

456 The propagules of *Avicennia officinalis* L. (*A. officinalis*) were collected during fruiting  
457 seasons from the mangrove swamps in Singapore (Berlayer Creek and Sungei Buloh Wetland  
458 Reserve). The seedlings were maintained in NaCl-free conditions by growing in potting  
459 mixture (Far East Flora, Singapore), until they reached the four-node stage (~2 months) in a  
460 greenhouse (25–35° C, 60–90 % relative humidity; 12 h photoperiod), after which they were  
461 carefully transferred to pots containing sand and were allowed to adapt for two days by  
462 watering with half-strength Hoagland's solution. The plants were then treated with half-  
463 strength Hoagland's solution containing 500 mM NaCl for varying time periods (0 h, 0.5 h, 1  
464 h, 2 h, 4 h, 8 h, 12 h, 24 h and 48 h).

465 For growth on Murashige-Skoog (MS) agar plates, *Arabidopsis* seeds of required genotypes  
466 were surface sterilized and cold stratified at 4 °C for 3 days, then the seeds were sown on MS  
467 agar plate and germinated at 22 °C under continuous light. One-week-old seedlings were  
468 carefully removed from the plate and subjected to salt (50 mM NaCl) treatment. The plant  
469 tissues were collected at various time periods (0 h, 0.5 h, 1 h, 3 h, 6 h and 24 h) and frozen in  
470 liquid nitrogen for total RNA isolation. For histochemical GUS expression analysis, One-  
471 week-old seedlings were treated with 50 mM NaCl for various time periods (0 h, 1 h, 3 h, 6 h  
472 and 24 h). For root length studies, the sterilized and cold stratified seeds were sown on MS  
473 agar plate with and without NaCl and the root lengths were measured and photographed One  
474 week after germination. For salt treatment in older **plants, 4-week-old plants** were treated  
475 with 100 mM NaCl for one week. The pots were flushed with water twice to remove the soil-  
476 bound NaCl followed by a recovery growth in NaCl-free water for one week. **Survival rate,**  
477 **chlorophyll contents, FW/DW ratio and leaf area were measured from untreated and**  
478 **recovered plants. In addition, untreated plants bearing mature siliques were collected for**  
479 **qRT-PCR analysis and GUS staining.**

480 Rice seeds of WT (*Oryza sativa* subsp. *japonica* cv. Nipponbare) and heterologous  
481 expression lines (*pUbi::AoCYP94B1*) were first germinated on plain MS or selection medium  
482 (MS+hygromycin) and then transferred to MS agar plates with and without NaCl (100 mM  
483 NaCl). After one week of growth in this medium, seedlings were photographed and the shoot  
484 length and root lengths were measured. WT and the transgenic lines generated were grown  
485 hydroponically (Yoshida et al., 1971) for salt treatment of older seedlings. Four-week-old  
486 seedlings were subjected to salt treatment (100 mM NaCl) for 21 days. After treatment, the  
487 rice seedlings were transferred back to NaCl-free hydroponic solution for recovery. Survival  
488 rates were calculated after 10 days of recovery and are shown as the percentage of seedlings  
489 that were alive. Plants that did not show any indication of recovery (no green shoots) were  
490 counted as dead.

#### 491 ***In silico* analysis**

492 The NCBI database was used as a search engine for nucleotide and protein sequences.  
493 Expasy tool (<https://web.expasy.org/translate/>) was used to translate the CDS sequences to  
494 amino acid sequences and multAlin (<http://multalin.toulouse.inra.fr/multalin/>) was used to  
495 align the amino acid sequences. Phylogenetic analysis was carried out using  
496 <http://www.phylogeny.fr/>. Primers for qRT-PCR were designed using NCBI  
497 (<https://www.ncbi.nlm.nih.gov/tools/primer-blast/>).

#### 498 **RNA isolation and Quantitative real-time PCR (qRT-PCR) analysis**

499 RNA was isolated from various plant samples (*A. officinalis*, *Arabidopsis* and rice) using  
500 TRIzol reagent (Thermo Fisher) following the manufacturer's instructions. An aliquot of this  
501 RNA (1 µg) was used to synthesize cDNA using Maxima first strand cDNA synthesis kit for  
502 qRT-PCR (Thermo Fisher) following the manufacturer's instructions. For genotyping of  
503 mutants and the heterologous expression lines, RNA was extracted from leaves of 4-week-old  
504 seedlings. The qRT-PCR to check expression of transcript levels was performed using  
505 StepOne<sup>TM</sup> Real-Time PCR machine (Applied Biosystems, Foster City, CA, USA) with the  
506 following programme: 20 s at 95 °C followed by 40 cycles of 03 s at 95 °C and 30 s at 60 °C.  
507 The SYBR Fast ABI Prism PCR kit from KAPA (Biosystems, Wilmington, MA, USA) was  
508 used for qRT-PCR analysis. The reaction mixture consisted of 5.2 µl master mix (provided in  
509 the kit), 0.2 µM each of forward (FW) and reverse (RV) primers, 3.4 µl nuclease-free water,  
510 and 1 µl sample cDNA template for a final volume of 10 µl. All of the data were analyzed  
511 using the StepOne<sup>TM</sup> Software (v2.1, ABI). The primers used for the qRT-PCR analysis are  
512 listed in Supplemental Table 1. **Gene expression levels were calculated based on  $\Delta\Delta CT$**

513 values and represented as relative expression levels (fold change) to constitutively expressed  
514 internal controls, *AtUbiquitin 10* and *AoUbiquitin 1* for *Arabidopsis* and *A. officinalis*,  
515 respectively.

### 516 **Chlorophyll estimation**

517 Chlorophyll concentrations were determined spectrophotometrically using 100 mg FW of  
518 untreated and recovered (from NaCl treatment) leaf material ground in 2 ml of acetone 80%  
519 (v/v). After complete extraction, the mixture was filtered and the volume adjusted to 5 ml  
520 with cold acetone. The absorbance of the extract was read at 663 and 645 nm and pigment  
521 concentrations were calculated as described previously (Arnon, 1949). The data represented  
522 are mean  $\pm$  SD of 4 biological replicates each with single plants.

### 523 **Estimation of total ion concentration (Na<sup>+</sup> and K<sup>+</sup>) from plants**

524 Control and salt-treated 4-week-old *Arabidopsis* seedlings were harvested and rinsed briefly  
525 with distilled water to remove surface contaminating Na<sup>+</sup>. Pool of three to four plants was  
526 taken as one replicate, and three to four independent replicates were used to generate the  
527 mean values reported. Leaves and roots from plants were separated and left to dry at 50 °C  
528 for 2 days. The dried tissue was ground into a powder in liquid nitrogen, and acid digestion  
529 and ion estimation were carried out as described earlier (Krishnamurthy et al., 2014). The  
530 amounts of ions estimated are presented as mg / gDW of plant sample.

### 531 **Histochemical GUS staining**

532 Transgenic *Arabidopsis* seedlings containing *pAtCYP94B1::GUS* and *pAtWRKY33::GUS*  
533 fusion constructs were treated as described above. GUS histochemical staining was  
534 performed by vacuum infiltrating the seedlings immersed in GUS staining solution [0.1 M  
535 sodium phosphate buffer pH 7.0, 10 M EDTA, 0.1% Triton X-100, 2 M 5-bromo-4-chloro-3-  
536 indolyl glucuronide (X-Gluc)] for 5 min followed by overnight incubation in the dark at 37  
537 °C without shaking. Staining solution was removed and several washes with 50 % ethanol  
538 were performed until the chlorophyll was bleached and tissues cleared. The images of stained  
539 whole seedlings with various salt treatments were recorded using a stereo microscope  
540 (NIKON SMZ1500) and other *pAtCYP94B1::GUS* images were taken using LEICA  
541 CTR5000 DIC microscope with a Nikon DS-Ril camera. GUS-stained images presented here  
542 represent the typical results of at least six independent plants for each treatment. **GUS**  
543 expression was quantified based on the relative intensities of blue coloration using ImageJ

544 software. Data presented are mean  $\pm$  SD of three biological replicates, each biological  
545 replicate consisting of at least six plants.

#### 546 **Chemical analysis of suberin in the root**

547 Isolation and depolymerization of suberized root cell walls from 4-week-old *Arabidopsis*  
548 seedlings were carried out as described previously (Franke et al., 2005; Hofer et al., 2008).  
549 Briefly, the samples were depolymerized by transesterification with 2 ml 1M MeOH/HCl for  
550 2 h at 80 °C followed by addition of NaCl/H<sub>2</sub>O. 10  $\mu$ g of adonitol was added as internal  
551 standard and aliphatic monomers were extracted (three times in 0.5 ml) in hexane. The  
552 combined organic phase was dried using CentriVap Cold Traps (Labconco) and derivatized  
553 using bis-(N,N-trimethylsilyl)-tri-fluoroacetamide (BSTFA; Sigma) as described previously  
554 (Franke et al., 2005; Hofer et al., 2008). Monomers were identified from their EI-MS spectra  
555 (75 eV, m/z 50-700) after capillary GC (DB-5MS, 30 m x 0.32 mm, 0.1  $\mu$ m, on column  
556 injection at 50 °C, oven 2 min at 50 °C, 10 °C min<sup>-1</sup> to 150 °C, 1 min at 150 °C, 5 °C min<sup>-1</sup> to  
557 310 °C, 30 min at 310 °C and He carrier gas with 2 ml min<sup>-1</sup>) on Shimadzu gas  
558 chromatograph combined with a quadrupole mass selective detector (GCMS-TQ80).  
559 Quantitative analysis of suberin monomers was carried out based on normalization to the  
560 internal standard. Three biological replicates, each consisting of 4-5 plants from all the  
561 genotypes tested, were used for the analysis. Suberin amounts are presented as  $\mu$ g/g DW of  
562 the sample.

#### 563 **Histochemical staining and microscopy**

564 For root histochemical studies, one-week-old *Arabidopsis* seedlings grown on MS agar were  
565 used. Seedlings were stained with Auramin O and Nile Red to visualize CS and SL,  
566 respectively following the methods described earlier (Ursache et al., 2018). For CS  
567 development, cells from the first CS appearance to the first elongated cell were checked. As  
568 described previously, (Barberon et al., 2016) suberin patterns were counted from the  
569 hypocotyl junction to the onset of endodermal cell elongation (Onset of elongation is the zone  
570 where an endodermal cell length is clearly more than twice its width). The roots were divided  
571 into various zones (Figure 6A) such as undifferentiated zone (young part of the root with no  
572 CS and SL), non-suberized zone (only CS, no SL) and suberized zone (patchy and continuous  
573 SL). For FDA transport assay, seedlings were incubated for 1 min in 0.5 x MS FDA (5  $\mu$ g ml<sup>-1</sup>),  
574 rinsed, and observed using a confocal laser scanning microscope (FV3000, Olympus).  
575 Excitation and detection parameters were set as follows: Auramin O 488 nm, 505-530 nm;

576 Nile Red 561nm, 600-650 nm; FDA 488 nm, 620-640 nm. Images were taken from at least  
577 10 *Arabidopsis* seedlings of each genotype tested for all the analyses.

578 For microscopy of rice roots, freehand cross-sections were prepared from the adventitious  
579 roots of salt-treated rice plants grown in hydroponics. Roots of ~100 mm length were taken  
580 from the hydroponically grown, salt-treated plants and were sectioned at varying lengths  
581 from the root tip: apical (0–20 mm), mid- (20–50 mm) and basal (50–80 mm). To check for  
582 SL deposition, sections were stained for 1 h with Fluorol Yellow 088 (Brundrett et al., 1991).  
583 Stained sections were viewed under a confocal laser scanning microscope (FV3000,  
584 Olympus) with excitation at 514 nm and detection at 520–550 nm and DAPI filter (excitation  
585 at 405 nm, detection at 420–460 nm). Root images shown represent the typical results of at  
586 least six independent rice plants.

### 587 **Chromatin Immunoprecipitation (ChIP) using *Arabidopsis* protoplasts**

588 Mesophyll protoplasts were isolated from leaves of 4-week-old WT *Arabidopsis* (Col-0)  
589 plants and transfected according to the protocol described earlier (Yoo et al., 2007) with  
590 minor modifications. For each transfection, 8–15 µg of purified plasmid DNA  
591 (*35S::AtWRKY33*, *35S::AtWRKY6* and *35S::AtWRKY9*) was used. **The three WRKYs were**  
592 **chosen to ensure that the interaction is specific to WRKY33 (Group I WRKY) and distinct**  
593 **from WRKY6 and WRKY9 that belong to Group I.** Polyethylene glycol (PEG)–calcium  
594 chloride transfection solution used was as follows: 25 % PEG, 0.4 M mannitol, and 150 mM  
595 CaCl<sub>2</sub>. The transfected protoplasts were incubated for 20 h at room temperature and fixed  
596 with formaldehyde. Protoplasts transfected with empty vectors were treated as the negative  
597 control. Anti-HA monoclonal antibody (Santa Cruz Biotechnology) bound to Protein-A  
598 agarose beads (Sigma) were used to immunoprecipitate the genomic DNA fragments. ChIP-  
599 qPCR analysis was carried out to check for promoter fragment enrichment in the final eluted  
600 chromatin from the ChIP experiment. Fold change in the enrichment of promoter fragments  
601 compared to the control were plotted. Results are based on data from three independent  
602 biological replicates each with at least three technical replicates.

### 603 **Luciferase assay using *Arabidopsis* protoplasts**

604 Mesophyll protoplasts were isolated from leaves of 4-week-old *atwrky33* mutant seedlings  
605 and luciferase assay was carried out as described earlier (Iwata et al., 2011). 1kb upstream  
606 sequence of *AtCYP94B1* was cloned into pGreen II-0800-LUC vector to generate the  
607 reporter. The vector with the *pAtCYP94B1* promoter (*pATCYP94B1::LUC*) was used as  
608 reference control (reporter) while *35S::AtWRKY33* was used as effector. **Two WRKY binding**

609 sites in the *AtCYP94B1* promoter fragment were mutated (TTGAC to TTacC) (Supplemental  
610 Figure S6B) by site directed mutagenesis and the mutant promoter was cloned into pGreen II-  
611 0800-LUC vector and used as an additional control. The luciferase assay was carried out  
612 using the Dual-Luciferase<sup>®</sup> Reporter Assay System (Promega) following the manufacturer's  
613 instructions. The luminescence was measured using the GloMax discover (Promega). Firefly  
614 luciferase activity was normalized to Renilla luciferase activity. Data shown were taken from  
615 four independent biological replicates each with three technical replicates.

### 616 **Yeast One-hybrid assays (Y1H)**

617 Y1H assays were performed using a Matchmaker<sup>™</sup> Gold Y1H System (Clontech, USA)  
618 according to the manufacturer's instructions. The promoter fragment, 2kb upstream of  
619 *AtCYP94B1* was cloned into the pAbAi vector upstream of *AURI-C* reporter gene. Coding  
620 sequence of *AtWRKY33*, *AtWRKY6* and *AtWRKY9* were cloned into the pGADT7-AD vector.  
621 The primers used for cloning are listed in Supplemental Table 1. The strains were then  
622 allowed to grow for 2–3 days at 30 °C to assess DNA–protein interactions.

### 623 **Statistical analysis**

624 Data presented are the mean values  $\pm$  SE / SD. Binary comparisons of data were statistically  
625 analyzed by Student's *t*-test ( $P < 0.05$  and  $P < 0.01$ ). For multiple comparisons between wild  
626 type, mutant and transgenic lines, one-way analysis of variance (ANOVA) was performed  
627 and Tukey-Kramer posthoc test was subsequently used as a multiple comparison procedure  
628 ( $P < 0.05$  and  $P < 0.01$ ).

### 629 **Acknowledgements**

630 This research grant was supported by the Singapore National Research Foundation under its  
631 Environment and Water Research Programme and administered by PUB, Singapore's  
632 National Water Agency, Singapore, NRF-EWI-IRIS (R-706-000-040-279). We thank the  
633 NParks Singapore for granting us permission to collect the mangrove samples from Berlayer  
634 Creek and Sungei Buloh Wetland Reserves (NP/RP 12-002-1 & NP/RP 12-002-2).

### 635 **Competing interests**

636 The authors declare no competing financial interests.

### 637 **Supplemental information**

638 **Supplemental Figure 1:** AoCYP94B1 is highly similar to other plant CYP94B subfamily



639 **Supplemental Figure 2:** *pAtCYP94B1::GUS* expression and growth of 4-week-old WT,  
640 *atcyp94b1* and *35S::AoCYP94B1 Arabidopsis* plants

641 **Supplemental Figure 3:** WT, *atcyp94b1*, *35S::AoCYP94B1* and *AtCYP94B1::AtCYP94B1*  
642 complementation lines of *Arabidopsis* responded similarly to mannitol treatment

643 **Supplemental Figure 4:** FDA penetration into endodermal cells show functionality of  
644 suberin

645 **Supplemental Figure 5:** Heterologous expression of *AoCYP94B1* increases deposition of  
646 apoplastic barrier (SL) in the roots of transgenic rice seedlings

647 **Supplemental Figure 6:** Promoter analysis of *AtCYP94B1*

648 **Supplemental Figure 7:** *A. officinalis* WRKY33 shares high sequence similarity with  
649 *Arabidopsis* WRKY33

650 **Supplemental Figure 8:** Tissue specific expression of *pAtWRKY33::GUS*

651 **Supplemental Figure 9:** Details of *atcyp94b1* mutant and heterologous expression lines

652 **Supplemental Figure 10:** Details of *Arabidopsis wrky33* mutant

653 **Supplemental Table 1:** Details of primer sequences used in the study

654 **Figure legends**

655 **Figure 1**

656 ***CYP94B1* is induced by salt stress in both *A. officinalis* and *Arabidopsis*:** (A-B) Gene  
657 expression analyses by qRT-PCR of *AoCYP94B1* in 2-month-old *Avicennia officinalis* plants,  
658 (A) tissue-specific expression and (B) temporal expression in roots and leaves after 500 mM  
659 NaCl treatment for varying time periods. (C) Tissue-specific expression of *AtCYP94B1* by  
660 qRT-PCR in one-week-old *Arabidopsis* seedlings. (D) Temporal expression of *AtCYP94B1* in  
661 roots and leaves after 50 mM NaCl treatment for varying time periods. Relative expression  
662 levels of transcripts with reference to *AtUbiquitin10* and *AoUbiquitin1* transcript levels are  
663 plotted in *Arabidopsis* and *A. officinalis*, respectively. The qRT-PCR data represent means  $\pm$   
664 SD from 3 biological replicates each with 3 technical replicates. (E) *pAtCYP94B1::GUS*  
665 expression in various tissues of mature plants bearing siliques. Scale bar= 500  $\mu$ m. (F)  
666 Relative quantification of *pAtCYP94B1::GUS* expression of E (G) Root endodermal cells  
667 showing *pAtCYP94B1::GUS* expression in control and salt-treated (50 mM NaCl for 3 h)  
668 one-week-old *Arabidopsis* seedlings, scale bar=100  $\mu$ m. Inset to G; Relative quantification of  
669 GUS intensity of G. Data are mean  $\pm$  SE of three biological replicates, each biological  
670 replicate consisting of at least six plants. (H) Median and (I) surface views of *AtCYP94B1*-



671 GFP expression in the root endodermal cells of control and salt-treated (50 mM NaCl for 24  
672 h) one-week-old *Arabidopsis* seedlings viewed under confocal microscope, **en: endodermis,**  
673 **st: stele.** Scale bar=20  $\mu$ m. Arrowheads in G-I show endodermal cells. **Asterisks in all the**  
674 **graphs indicate statistically significant differences (\*= $P < 0.05$ , \*\*= $P < 0.01$ ) as measured by**  
675 **Student's *t*-test between control and the treatments.**

## 676 **Figure 2**

677 **Heterologous expression of *AoCYP94B1* increases salt tolerance in *Arabidopsis***  
678 **seedlings:** (A) Comparison of seedling growth among WT, *atcyp94b1* mutant and three  
679 independent lines of *35S::AoCYP94B1* heterologously expressed in the mutant background.  
680 (B) Root growth rates under salt treatment in WT, *atcyp94b1* and *35S::AoCYP94B1*  
681 transgenic lines. Surface sterilized and cold stratified seeds were sown on MS agar plates  
682 with or without NaCl (50 and 75 mM). Photographs and root length measurements were  
683 taken at the end of one week after germination. Data represent mean  $\pm$  SE of three  
684 independent experiments each with at least 15 replicates per experiment. Different letters  
685 indicate statistically significant differences between genotypes as determined by the ANOVA  
686 employing the Tukey-Kramer posthoc test ( $P < 0.01$ ). Same letters indicate no statistical  
687 difference between them. Scale bar=10 mm.

## 688 **Figure 3**

689 **Heterologous expression of *AoCYP94B1* increases salt tolerance and regulates  $\text{Na}^+$**   
690 **accumulation in *Arabidopsis* plants:** (A-E) Growth response to salt (100 mM NaCl for 1  
691 week) was monitored in one-month-old, soil grown WT, *atcyp94b1* mutant and three  
692 independent lines of *35S::AoCYP94B1* heterologously expressed in the mutant background.  
693 (A) **Growth of the plants shown under untreated condition, under salt-treated condition and**  
694 **after recovery growth in normal water for one week.** Scale bar=10 mm. wk; week. Various  
695 **growth parameters such as (B) survival rate (n=12) (C) leaf area (n=12) (D) FW/DW ratio**  
696 **and (n=12) (E) chlorophyll content (n=5) of untreated and recovered *Arabidopsis* plants.** (F)  
697 Total  $\text{Na}^+$  content in the leaves and roots as well as (G) total  $\text{K}^+$  content in the leaves and  
698 roots of 4-week-old WT, *atcyp94b1* and three *35S::AoCYP94B1* lines. Data are mean  $\pm$  SE of  
699 three biological replicates, each biological replicate consisting of at least 3 plants. Different  
700 letters indicate statistically significant differences between genotypes as determined by the  
701 ANOVA employing the Tukey-Kramer posthoc test ( $P < 0.05$ ). Same letters indicate no  
702 statistical difference between them.

703 **Figure 4**

704 **Heterologous expression of *AoCYP94B1* increases salt tolerance in transgenic rice**  
705 **seedlings: (A)** Phenotype of untreated 2-week-old WT and *pUBI::AoCYP94B1* seedlings **(B)**  
706 Shoot length of untreated WT and *pUBI::AoCYP94B1* seedlings **(C)** Phenotype of one-week-  
707 old WT and *pUBI::AoCYP94B1* seedlings after 100 mM NaCl treatment. **(D)** Shoot and root  
708 lengths of WT and *pUBI::AoCYP94B1* seedlings after three and 6 days of salt treatment. **(E)**  
709 4-week-old WT and *pUBI::AoCYP94B1* plants grown in hydroponics, before salt treatment,  
710 after 21 days of 100 mM NaCl treatment and an additional 10 days of recovery growth **(F)**  
711 Survival rates of WT and *pUBI::AoCYP94B1* plants after salt treatment and recovery growth.  
712 Data in (B, D and F) are mean  $\pm$  SD of three independent experiments each with at least 15  
713 seedlings per experiment. Asterisks indicate statistically significant differences (\*\* $P < 0.01$ )  
714 between *pUBI::AoCYP94B1* line and WT as measured by Student's *t*-test. Scale bar=1 cm,  
715 DAT; days after treatment.

716 **Figure 5**

717 **Complementation of *atcyp94b1* with *Arabidopsis AtCYP94B1* increases salt tolerance**  
718 **and suberin levels in *Arabidopsis* roots: (A-C)** Comparison of seedling growth among WT,  
719 *atcyp94b1* mutant and two independent complementation lines of *AtCYP94B1::AtCYP94B1*  
720 in mutant background. **(D)** Root growth rates under salt treatment in WT, *atcyp94b1* and  
721 *AtCYP94B1::AtCYP94B1* complementation lines. Surface sterilized and cold stratified seeds  
722 were sown on MS agar plates with or without NaCl (50 and 75 mM). Photographs and root  
723 length measurements were taken at the end of one week after germination. Data are mean  $\pm$   
724 SE of at least 15 biological replicates. Different letters indicate statistically significant  
725 differences between genotypes as determined by the ANOVA employing the Tukey-Kramer  
726 posthoc test ( $P < 0.01$ ). Same letters indicate no statistical difference between them. Scale  
727 bar=10 mm. **(E)** Suberin monomer composition in the seedling roots of 4-week-old WT,  
728 *atcyp94b1*, *pAtCYP94B1::AtCYP94B1* and *35S::AoCYP94B1* were quantified using GC-  
729 MS/MS analysis. Data are mean  $\pm$  SD of three independent biological replicates each with 4-  
730 5 plants. Different letters indicate statistically significant differences between genotypes as  
731 determined by the ANOVA employing the Tukey-Kramer posthoc test ( $P < 0.05$ ). Same letters  
732 indicate no statistical difference between them. **(F)** Chromatogram (multiple reaction  
733 monitoring) for the standard suberin monomers and internal standard (adonitol).

734 **Figure 6**

735 **CYP94B1 is involved in apoplastic barrier (SL) formation in *Arabidopsis* roots:** For root  
736 anatomical studies, one-week-old *Arabidopsis* seedlings grown on MS agar plates were used.  
737 Images were taken from similar parts of the WT, *atcyp94b1*, *pAtCYP94B1::AtCYP94B1* and  
738 *35S::AoCYP94B1* stained roots. Seedlings were stained with Auramin O to visualize CSs,  
739 and with Nile Red to view SL. Suberin patterns were counted as described in materials and  
740 methods. **(A) Schematic of endodermal differentiation (adapted from (Barberon et al., 2016)).**  
741 **Three different zones are shown: undifferentiated, non-suberized, and suberized zone (patchy**  
742 **and continuous zones are distinguished).** **(B)** Representative images showing CSs in the  
743 endodermis of non-suberized zones of roots. **(C, D)** Images showing SL deposition in the  
744 endodermal cells of patchy and continuous suberized zones of roots. **(E)** Percentage of  
745 endodermal cells with SL in the suberized zones. n=10 seedlings. **(F)** FDA penetration after 1  
746 min in the suberized root zones of WT, *atcyp94b1*, *pAtCYP94B1::AtCYP94B1* and  
747 *35S::AoCYP94B1*. **(G)** Percentage of endodermal cells with FDA penetration in the suberized  
748 zone. **ep: epidermis, co: cortex, en: endodermis (in red).** Arrowheads indicate the location of  
749 CS and SL, except in F where arrowheads show the endodermis, Scale bar=10  $\mu$ m. Different  
750 letters indicate statistically significant differences between genotypes as determined by the  
751 ANOVA employing the Tukey-Kramer posthoc test ( $P<0.01$ ). Same letters indicate no  
752 statistical difference between them.

### 753 **Figure 7**

754 **AtWRKY33 transcription factor acts as an upstream regulator of *AtCYP94B1*:** **(A-B)**  
755 Gene expression analyses by qRT-PCR of *AtWRKY33* in one-week-old *Arabidopsis*  
756 seedlings. **(A)** Tissue-specific expression, **(B)** temporal expression in roots and leaves after  
757 50 mM NaCl treatment for varying time periods. **(C) Relative quantification and (D)**  
758 ***pAtWRKY33::GUS* expression analysis in one-week-old seedling roots upon 50 mM NaCl**  
759 **treatment. Scale bar=500  $\mu$ m. Asterisks indicate statistically significant differences ( $*=P<$**   
760 **0.05,  $**=P<$  0.01) between 0 h and other time points as measured by Student's *t*-test. **(E)**  
761 **Root endodermal cells showing *pAtWRKY33::GUS* expression in control and salt-treated (50**  
762 **mM NaCl for 6 h) one-week-old *Arabidopsis* seedlings, scale bar=100  $\mu$ m. Arrowheads show**  
763 **endodermal cells. **(F)** Suppression in the transcript levels of *AtCYP94B1* in *atwrky33* T-DNA**  
764 **insertional mutant roots compared to WT. Asterisks indicate statistically significant**  
765 **differences ( $**=P<$  0.01) between WT and *atwrky33* mutant as measured by Student's *t*-test.**  
766 **(G) Chromatin immunoprecipitation (ChIP)-qPCR of HA-tagged *AtWRKY33* in *Arabidopsis***  
767 **protoplasts, *AtWRKY6* and *AtWRKY9* were used as negative controls. Fold change in the****

768 enrichment of promoter fragments compared to no protein control are plotted. qRT-PCR data  
769 represent means  $\pm$  SD from 3 biological replicates each with 3 technical replicates. Asterisks  
770 indicate statistically significant differences (\*\*= $P < 0.01$ ) between no protein control and  
771 AtWRKY33 as measured by Student's *t*-test. **(H) Yeast one-hybrid assay showing regulation**  
772 **of *AtCYP94B1* by AtWRKY33. AtWRKY6 and AtWRKY9 were used as additional controls.**  
773 The representative growth status of yeast cells is shown on SD/-Leu agar medium with or  
774 without 100 ng of aureobasidin A. Numbers on the top of each photograph indicate relative  
775 densities of the cells 4 days post-inoculation. **(I) Luciferase assay was carried out using the**  
776 **mesophyll protoplasts obtained from the leaves of 4-week-old *atwrky33* mutants. The**  
777 ***pAtCYP94B1::LUC* was used as the control and *35S::AtWRKY33* was used as the test.**  
778 ***AtCYP94B1* promoter fragment with mutated WRKY binding sites was used as additional**  
779 **control.** Firefly luciferase activity was normalized to Renilla luciferase activity and plotted.  
780 Data represent mean  $\pm$  SD of four independent biological replicates each with three technical  
781 replicates. Asterisks indicate statistically significant differences (\*\*= $P < 0.01$ ) as measured by  
782 Student's *t*-test between the control and the test.

### 783 **Figure 8**

784 **AtWRKY33 regulates apoplastic barrier formation via *AtCYP94B1*:** For root anatomical  
785 studies, one-week-old WT, *atwrky33* mutants and *35S::AtCYP94B1 atwrky33* (in the  
786 *atwrky33* mutant background) *Arabidopsis* seedlings grown on MS agar plates were used.  
787 Images of stained roots were taken from the same regions for all the genotypes. For  
788 visualizing CSs, seedlings were stained with Auramin O, while they were stained with Nile  
789 Red to view SL. Suberin patterns were counted as described in materials and methods. **(A)**  
790 Representative images showing Casparian strip development in the non-suberized  
791 endodermal cells of all three genotypes. **(B)** SL deposition in the suberized endodermal cells  
792 of all three genotypes. **(C)** Percentage of endodermal cells with SL in the suberized zones of  
793 the roots. Arrowheads indicate the location of CS and SL, n=10 seedlings, Scale bar=10  $\mu$ m.  
794 Different letters indicate statistically significant differences between genotypes as determined  
795 by the ANOVA employing the Tukey-Kramer posthoc test ( $P < 0.01$ ). Same letters indicate no  
796 statistical difference between them. **(D)** Comparison of seedling growth among WT,  
797 *atwrky33* mutant and three independent lines of *35S::AtCYP94B1 atwrky33* ectopic  
798 expression lines. Surface sterilized and cold stratified seeds were sown on MS agar plates  
799 with or without NaCl (50 and 75 mM). Photographs were taken at the end of one week after  
800 germination. Scale bar=10 mm. **en: endodermis.** **(E)** Proposed model based on our data

801 showing regulation of root apoplastic barrier formation by WRKY33 through controlling  
802 *CYP94B1* leading to salt tolerance.

### 803 **Supplemental Figures**

#### 804 **Supplemental Fig. 1: AoCYP94B1 is highly similar to other plant CYP94B subfamily:**

805 **(A)** A phylogenetic tree was constructed using the deduced amino acid sequences of  
806 *AoCYP94B1* along with *Manihot esculenta* (XP\_021615193.1), *Theobroma cacao*  
807 (EOY22465.1), *Gossypium hirsutum* (XP\_016708735.1), *Vitis vinifera* (XP\_002279981.1),  
808 *Citrus clementina* (XP\_006440103.1), *Arabidopsis thaliana* (NP\_201150.1), *Capsicum*  
809 *chinensis* (PHU16576.1), *Capsicum baccatum* (PHT53723.1), *Solanum lycopersicum*  
810 (XP\_004236553.1) *Solanum tuberosum* (XP\_006351473.1), *Nicotiana attenuata*  
811 (XP\_019261423.1), *Nicotiana tabacum* (XP\_016469144.1), *Oryza sativa* (XP\_015615209.1),  
812 *Helianthus annuus* (XP\_021972959.1), *Sesamum indicum* (XP\_011083758.1). The  
813 phylogenetic trees were constructed using Phylogeny.fr (<http://www.phylogeny.fr/>) by  
814 bootstrap method. The scale bar indicates the branch lengths. **(B) Alignment of AoCYP94B1**  
815 **derived amino acid sequence with AoCYP94B1 of other crop species using MultAlin.** The  
816 Cytochrome P450 cysteine heme-iron ligand signature motif, highlighted in black square,  
817 was well conserved.

#### 818 **Supplemental Fig. 2: *pAtCYP94B1::GUS* expression and growth of 4-week-old WT,**

819 ***atcyp94b1* and *35S::AoCYP94B1* Arabidopsis plants:** **(A)** *pAtWRKY33::GUS* expression  
820 analysis in one-week-old seedling roots upon 50 mM NaCl treatment. Scale bar=500  $\mu$ m. **(B)**  
821 Growth of the one-month-old, soil grown WT, *atcyp94b1* mutant and three independent lines  
822 of *35S::AoCYP94B1* heterologously expressed in the mutant background plants shown under  
823 untreated condition, under salt-treated condition and after recovery growth in normal water  
824 for one week. Scale bar=10 mm. wk; week.

#### 825 **Supplemental Fig. 3: WT, *atcyp94b1*, *35S::AoCYP94B1* and *AtCYP94B1::AtCYP94B1***

826 **complementation lines of Arabidopsis responded similarly to mannitol treatment:** **(A)**  
827 Comparison of seedling growth among WT, *atcyp94b1* mutant and three independent lines of  
828 *35S::AoCYP94B1* heterologously expressed in the mutant background. **(B)** Growth of WT,  
829 *atcyp94b1* and *AtCYP94B1::AtCYP94B1* complementation lines. Surface sterilized and cold  
830 stratified seeds were sown on MS agar plates with or without mannitol (50 and 75 mM).  
831 Photographs were taken at the end of one week after germination. Scale bar=10 mm.

832 **Supplemental Fig. 4: FDA penetration into endodermal cells show functionality of**  
833 **suberin:** One-week-old WT, *atcyp94b1*, *pAtCYP94B1::AtCYP94B1* and *35S::AoCYP94B1*  
834 seedlings were incubated in FDA for 1 min, rinsed and images at the corresponding positions  
835 were taken using confocal microscopy. **(A, B)** FDA penetration into endodermal cells in the  
836 undifferentiated zone. **(C, D)** FDA penetration into endodermal cells in the non-suberized  
837 zone. Scale bar= 10  $\mu$ m, **ep: epidermis, co: cortex, en: endodermis.** n=10 for all the analyses.

838 **Supplemental Fig. 5: Heterologous expression of *AoCYP94B1* increases deposition of**  
839 **apoplastic barrier (SL) in the roots of transgenic rice seedlings: (A-D)** Cross sections  
840 were made from the roots of 4-week-old hydroponically grown, salt-treated WT and  
841 *pUBI::AoCYP94B1* plants at varying lengths from the root tip: apical (0–20 mm), mid (20–50  
842 mm) and basal (50–80 mm). For visualizing SL, sections were stained with Fluorol Yellow  
843 088. Images of endodermal SL in the apical, mid and basal regions of **(A)** WT and **(B)**  
844 *pUBI::AoCYP94B1\_1*. Images of exodermal SL in the apical, mid and basal regions of **(C)**  
845 WT and **(D)** *pUBI::AoCYP94B1\_1*. Arrowheads indicate the presence of SL. Asterisks  
846 indicate **endodermal cells lacking SL**. Images were taken from sections made using at least  
847 three seedlings. Scale bar= 20  $\mu$ m. **en: endodermis, ex: exodermis.**

848 **Supplemental Fig. 6: Promoter analysis of *AtCYP94B1*: (A)**  
849 *AtCYP94B1* promoter fragment showing stress-related transcription factor binding domains  
850 such as WRKY (red), MYB (pink) and MYC (pale pink). The DREME/MEME software  
851 suite (Bailey, 2011) was used to perform stringent motif searches within a 2000-bp region  
852 upstream of start codon of the coding region of *AtCYP94B1*. **(B)** *AtCYP94B1* promoter  
853 fragment used for Luciferase assay. Two WRKY binding domains highlighted in yellow were  
854 mutated by site directed mutagenesis (TT**G**AC to TT**a**cC).

855 **Supplemental Fig. 7: *A. officinalis* WRKY33 shares high sequence similarity with**  
856 ***Arabidopsis* WRKY33:** A phylogenetic tree was constructed using the deduced amino acid  
857 sequences of *AoWRKY33* along with *Theobroma cacao* (XP\_017977471.1), *Populus*  
858 *trichocarpa* (XP\_002323637.2), *Ricinus communis* (EEF35722.1), *Jatropha curcas*  
859 (XP\_012089749.1), *Solanum lycopersicum* (XP\_004246308.1), *Nicotiana tabacum*  
860 (NP\_001311970.1), *Capsicum chinense* (PHU06953.1), *Capsicum annuum*  
861 (NP\_001311528.1), *Sesamum indicum* (XP\_020553388.1), *Coffea arabica*  
862 (XP\_027068692.1), *Coffea eugenioides* (XP\_027173412.1), *Arabidopsis thaliana*  
863 (NP\_181381.2). The phylogenetic trees were constructed using Phylogeny.fr  
864 (<http://www.phylogeny.fr/>) by bootstrap method. The scale bar indicates the branch lengths.



865 **(B)** Sequence alignment of the derived amino acid sequences of *AoWRKY33* with  
866 *Arabidopsis AtWRKY33*. WRKY33s have two WRKY domains. Conserved WRKY domains  
867 are highlighted in yellow and conserved sequences are shown in red.

868 **Supplemental Fig. 8: Tissue specific expression of *pAtWRKY33::GUS*:** Expression of  
869 *pAtCYP94B1::GUS* in various tissues of mature plants bearing siliques. Scale bar= 500  $\mu$ m.

870 **Supplemental Fig. 9: Details of *atcyp94b1* mutant and heterologous expression lines:** (A)  
871 Genetic map of *atcyp94b1* T-DNA insertion used in generating *35S::AoCYP94B1* lines. (B)  
872 Genotyping PCR confirms the homozygosity of the *atcyp94b1* mutant lines. (C) qRT-PCR  
873 shows suppressed expression of *AtCYP94B1* in *atcyp94b1* T-DNA insertional mutants. (D)  
874 qRT-PCR shows high level of expression of *35S::AoCYP94B1* in the *atcyp94b1* mutant  
875 background. \* indicates the lines used for further analysis. Relative expression levels of  
876 transcripts with reference to *Ubiquitin 10* transcript levels, qRT-PCR data represent means  $\pm$   
877 SD from 3 biological replicates each with 3 technical replicates.

878 **Supplemental Fig. 10: Details of *Arabidopsis AtWRKY33* mutant:** (A) Genetic map of  
879 *atwrky33* T-DNA insertion used. (B) Genotyping PCR confirms the homozygosity of the  
880 *atwrky33* mutant lines. (C) qRT-PCR shows suppressed expression of the *AtWRKY33* gene in  
881 *atwrky33* T-DNA insertional mutants. Relative expression levels of transcripts with reference  
882 to *Ubiquitin 10* transcript levels, qRT-PCR data represent means  $\pm$  SD from 3 biological  
883 replicates each with 3 technical replicates.



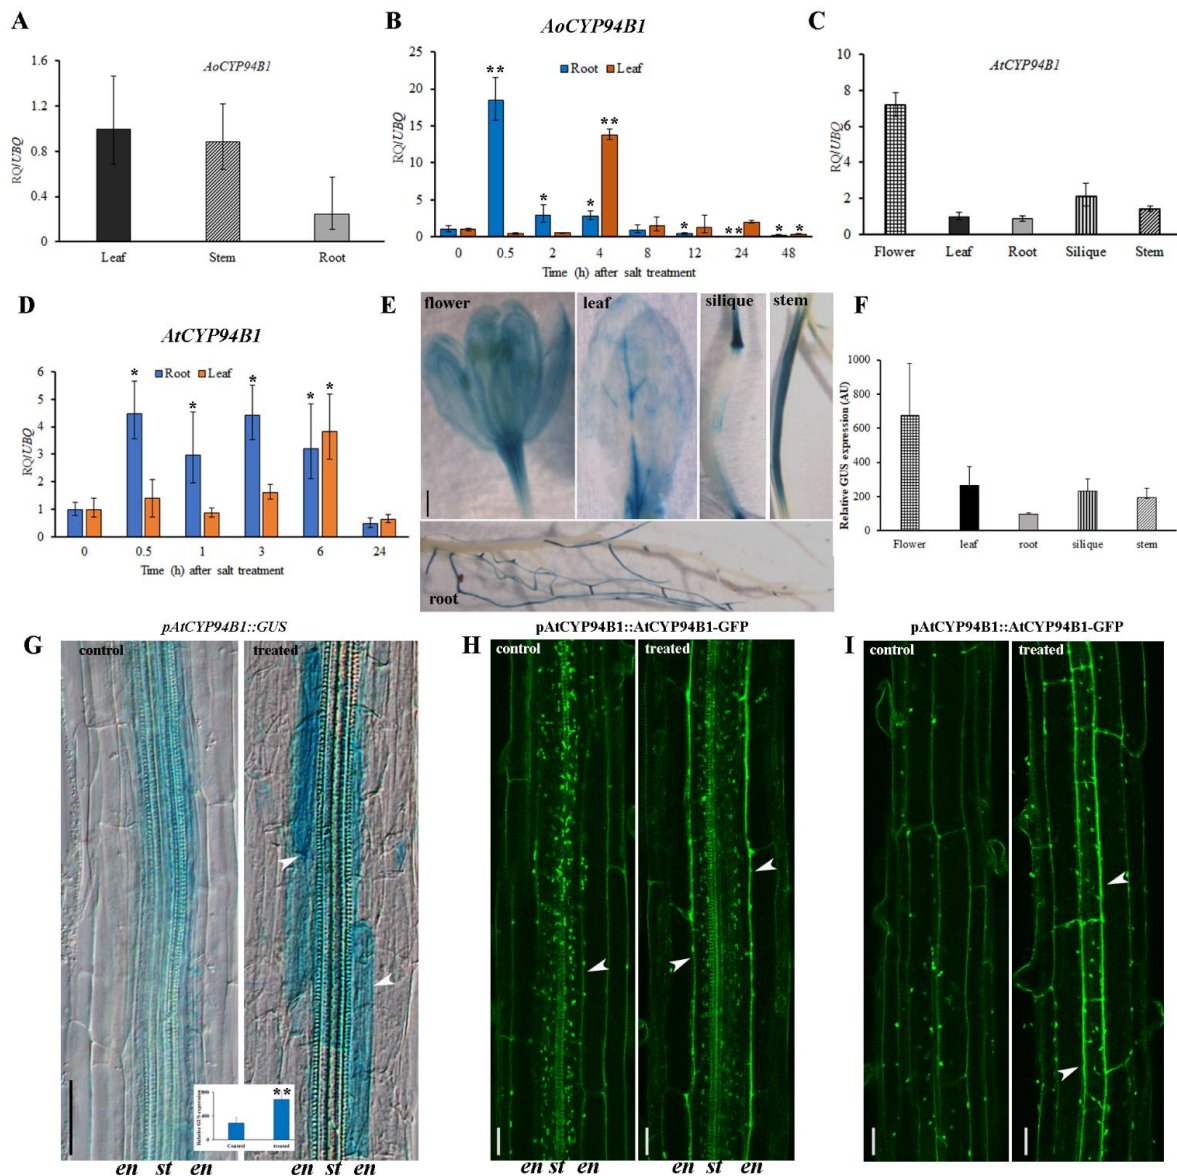

**Figure 1**

***CYP94B1* is induced by salt stress in both *A. officinalis* and *Arabidopsis*:** (A-B) Gene expression analyses by qRT-PCR of *AoCYP94B1* in 2-month-old *Avicennia officinalis* plants, (A) tissue-specific expression and (B) temporal expression in roots and leaves after 500 mM NaCl treatment for varying time periods. (C) Tissue-specific expression of *AtCYP94B1* by qRT-PCR in one-week-old *Arabidopsis* seedlings. (D) Temporal expression of *AtCYP94B1* in roots and leaves after 50 mM NaCl treatment for varying time periods. Relative expression levels of transcripts with reference to *AtUbiquitin10* and *AoUbiquitin1* transcript levels are plotted in *Arabidopsis* and *A. officinalis*, respectively. The qRT-PCR data represent means  $\pm$  SD from 3 biological replicates each with 3 technical replicates. (E) *pAtCYP94B1::GUS* expression in various tissues of mature plants bearing siliques. Scale bar= 500  $\mu$ m. (F) Relative quantification of *pAtCYP94B1::GUS* expression of E (G) Root endodermal cells showing *pAtCYP94B1::GUS* expression in control and salt-treated (50 mM NaCl for 3 h) one-week-old *Arabidopsis* seedlings, scale bar=100  $\mu$ m. Inset to G; Relative quantification of GUS intensity of G. Data are mean  $\pm$  SE of three biological replicates, each biological replicate consisting of at least six plants. (H) Median and (I) surface views of *pAtCYP94B1::GFP* expression in the root endodermal cells of control and salt-treated (50 mM NaCl for 24 h) one-week-old *Arabidopsis* seedlings viewed under confocal microscope, en: endodermis, st: stele. Scale bar=20  $\mu$ m. Arrowheads in G-I show endodermal cells. Asterisks in all the graphs indicate statistically significant differences (\*= $P$ < 0.05, \*\*= $P$ < 0.01) as measured by Student's *t*-test between control and the treatments.

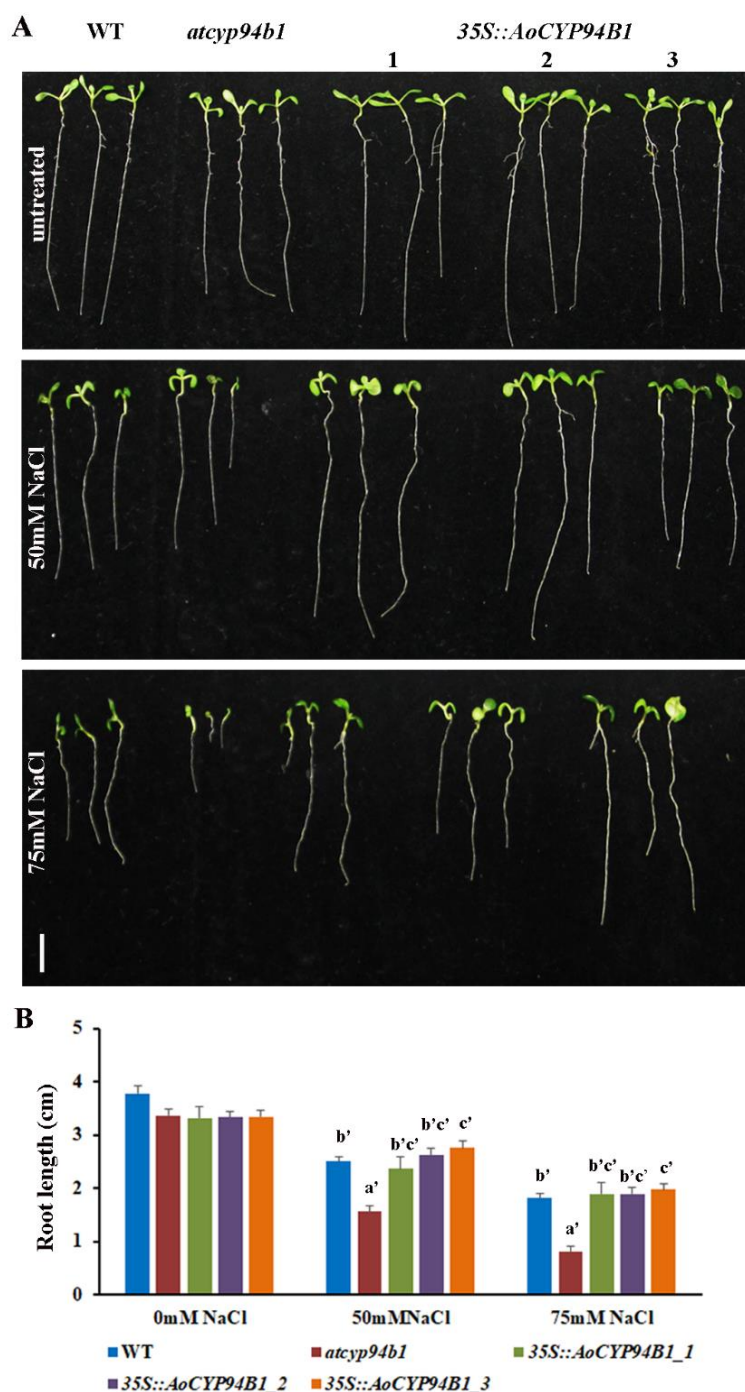

**Figure 2**

**Heterologous expression of *AoCYP94B1* increases salt tolerance in *Arabidopsis* seedlings:** (A) Comparison of seedling growth among WT, *atcyp94b1* mutant and three independent lines of *35S::AoCYP94B1* heterologously expressed in the mutant background. (B) Root growth rates under salt treatment in WT, *atcyp94b1* and *35S::AoCYP94B1* transgenic lines. Surface sterilized and cold stratified seeds were sown on MS agar plates with or without NaCl (50 and 75 mM). Photographs and root length measurements were taken at the end of one week after germination. Data represent mean  $\pm$  SE of three independent experiments each with at least 15 replicates per experiment. Different letters indicate statistically significant differences between genotypes as determined by the ANOVA employing the Tukey-Kramer posthoc test ( $P < 0.01$ ). Same letters indicate no statistical difference between them. Scale bar=10 mm.

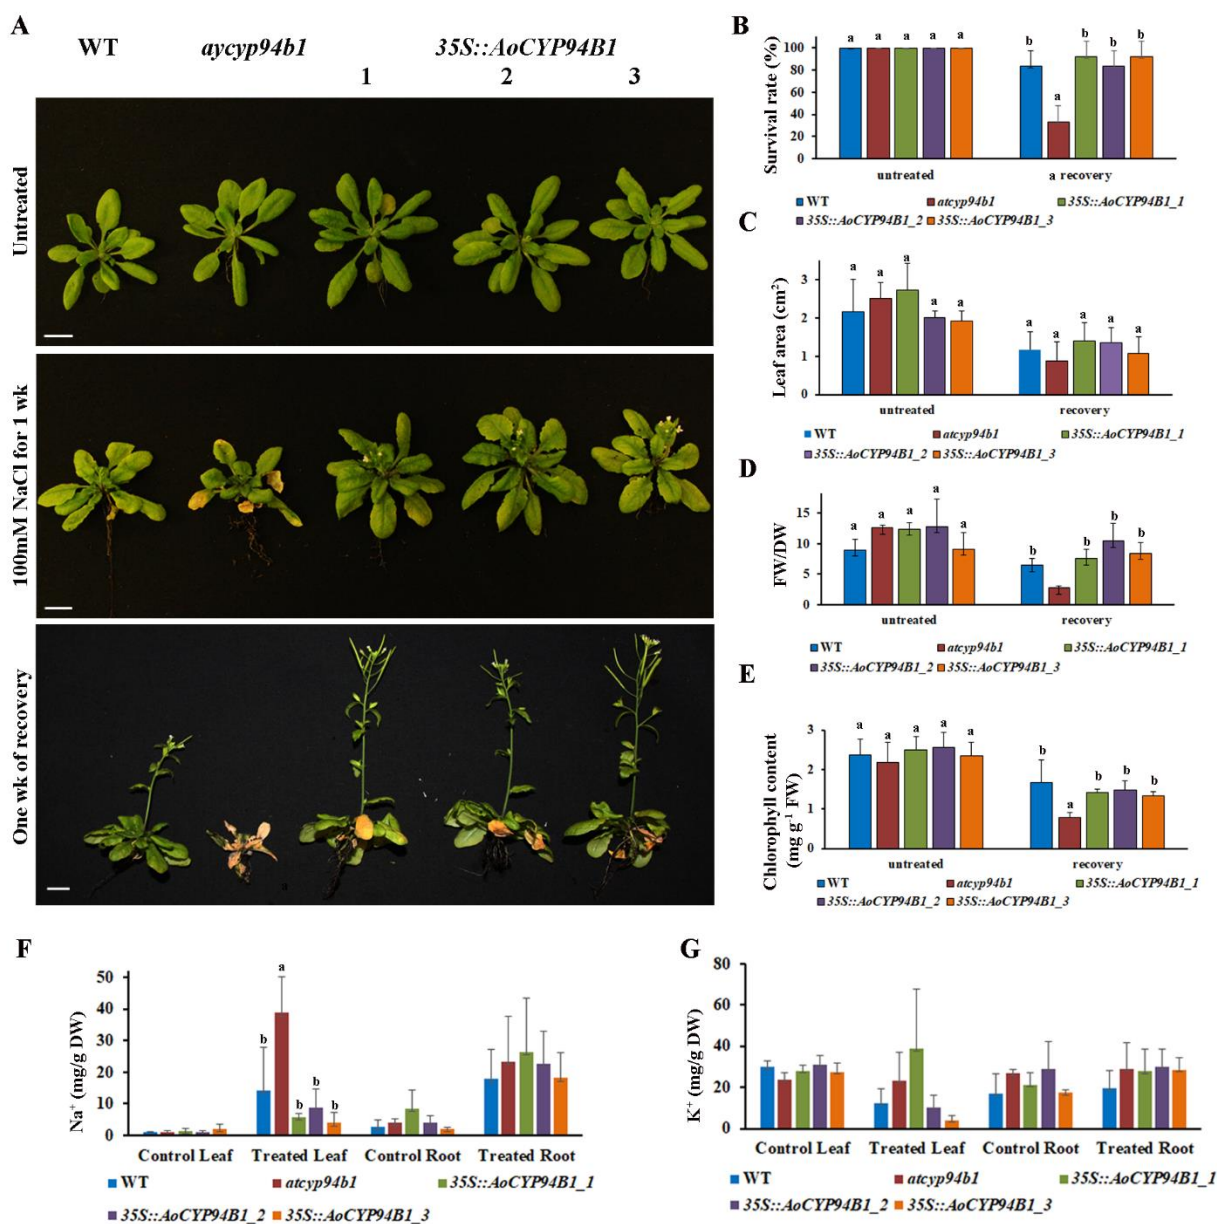

**Figure 3**

**Heterologous expression of *AoCYP94B1* increases salt tolerance and regulates Na<sup>+</sup> accumulation in *Arabidopsis* plants:** (A-E) Growth response to salt (100 mM NaCl for 1 week) was monitored in one-month-old, soil grown WT, *atcyp94b1* mutant and three independent lines of 35S::*AoCYP94B1* heterologously expressed in the mutant background. (A) Growth of the plants shown under untreated condition, under salt-treated condition and after recovery growth in normal water for one week. Scale bar=10 mm. wk; week. Various growth parameters such as (B) survival rate (n=12) (C) leaf area (n=12) (D) FW/DW ratio and (n=12) (E) chlorophyll content (n=5) of untreated and recovered *Arabidopsis* plants. (F) Total Na<sup>+</sup> content in the leaves and roots as well as (G) total K<sup>+</sup> content in the leaves and roots of 4-week-old WT, *atcyp94b1* and three 35S::*AoCYP94B1* lines. Data are mean ± SE of three biological replicates, each biological replicate consisting of at least 3 plants. Different letters indicate statistically significant differences between genotypes as determined by the ANOVA employing the Tukey-Kramer posthoc test ( $P < 0.05$ ). Same letters indicate no statistical difference between them.



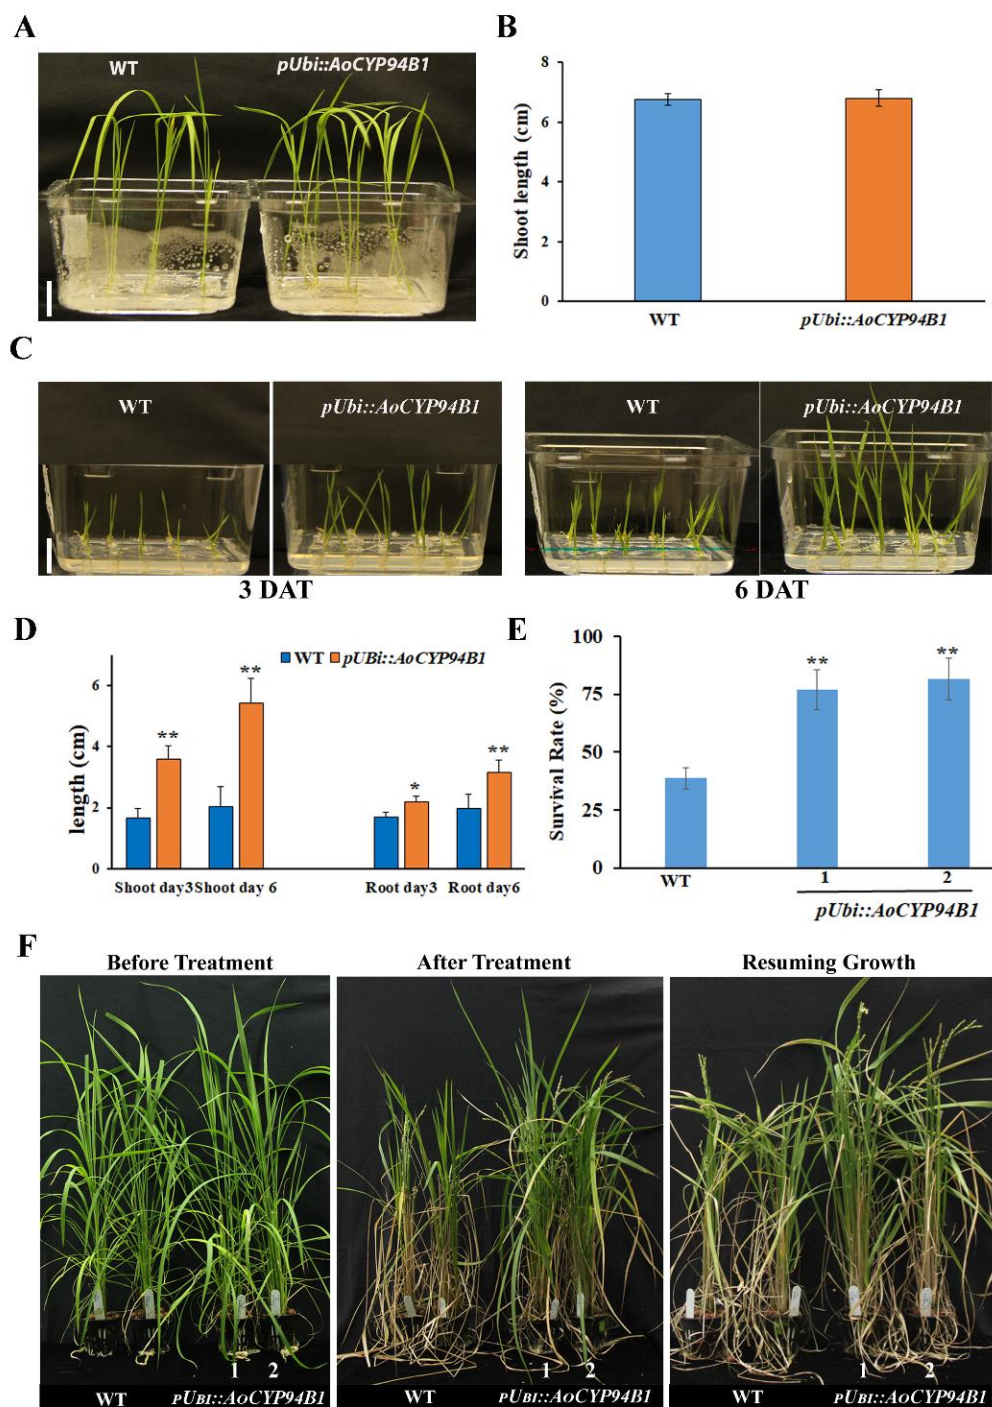

**Figure 4**

**Heterologous expression of *AoCYP94B1* increases salt tolerance in transgenic rice seedlings:** (A) Phenotype of untreated 2-week-old WT and *pUBI::AoCYP94B1* seedlings (B) Shoot length of untreated WT and *pUBI::AoCYP94B1* seedlings (C) Phenotype of one-week-old WT and *pUBI::AoCYP94B1* seedlings after 100 mM NaCl treatment. (D) Shoot and root lengths of WT and *pUBI::AoCYP94B1* seedlings after three and six days of salt treatment. (E) 4-week-old WT and *pUBI::AoCYP94B1* plants grown in hydroponics, before salt treatment, after 21 days of 100 mM NaCl treatment and an additional 10 days of recovery growth (F) Survival rates of WT and *pUBI::AoCYP94B1* plants after salt treatment and recovery growth. Data in (B, D and F) are mean  $\pm$  SD of three independent experiments each with at least 15 seedlings per experiment. Asterisks indicate statistically significant differences (\*\* $P < 0.01$ ) between *pUBI::AoCYP94B1* line and WT as measured by Student's *t*-test. Scale bar=1 cm, DAT; days after treatment.

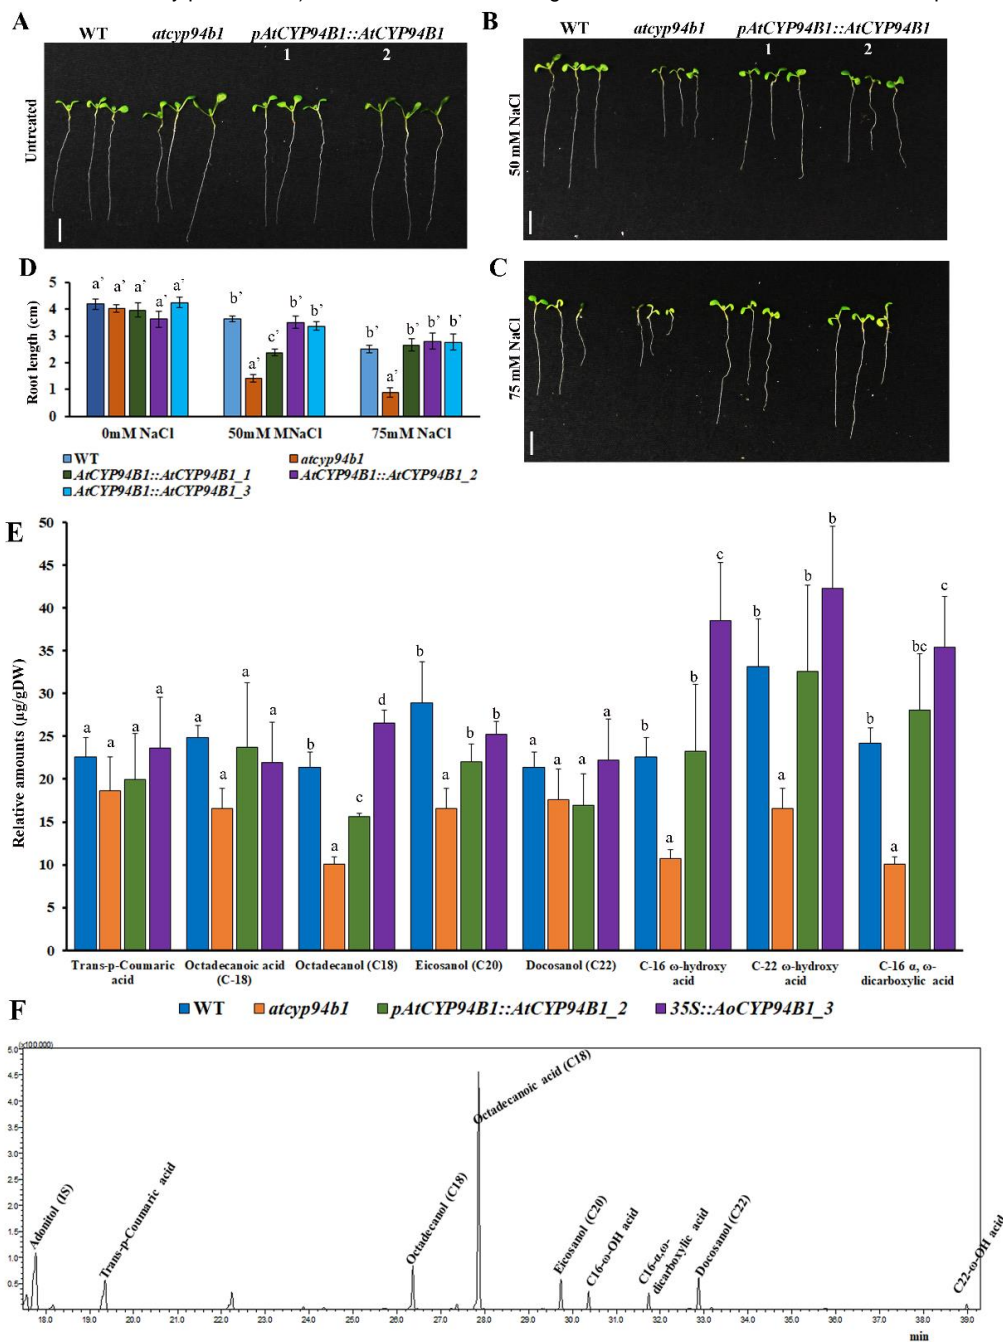

**Figure 5**

**Complementation of *atcyp94b1* with *Arabidopsis AtCYP94B1* increases salt tolerance and suberin levels in *Arabidopsis* roots:** (A-C) Comparison of seedling growth among WT, *atcyp94b1* mutant and two independent complementation lines of *AtCYP94B1::AtCYP94B1* in mutant background. (D) Root growth rates under salt treatment in WT, *atcyp94b1* and *AtCYP94B1::AtCYP94B1* complementation lines. Surface sterilized and cold stratified seeds were sown on MS agar plates with or without NaCl (50 and 75 mM). Photographs and root length measurements were taken at the end of one week after germination. Data are mean  $\pm$  SE of at least 15 biological replicates. Different letters indicate statistically significant differences between genotypes as determined by the ANOVA employing the Tukey-Kramer posthoc test ( $P < 0.01$ ). Same letters indicate no statistical difference between them. Scale bar=10 mm. (E) Suberin monomer composition in the seedling roots of 4-week-old WT, *atcyp94b1*, *pAtCYP94B1::AtCYP94B1* and *35S::AoCYP94B1* were quantified using GC-MS/MS analysis. Data are mean  $\pm$  SD of three independent biological replicates each with 4-5 plants. Different letters indicate statistically significant differences between genotypes as determined by the ANOVA employing the Tukey-Kramer posthoc test ( $P < 0.05$ ). Same letters indicate no statistical difference between them. (F) Chromatogram (multiple reaction monitoring) for the standard suberin monomers and internal standard (adonitol).

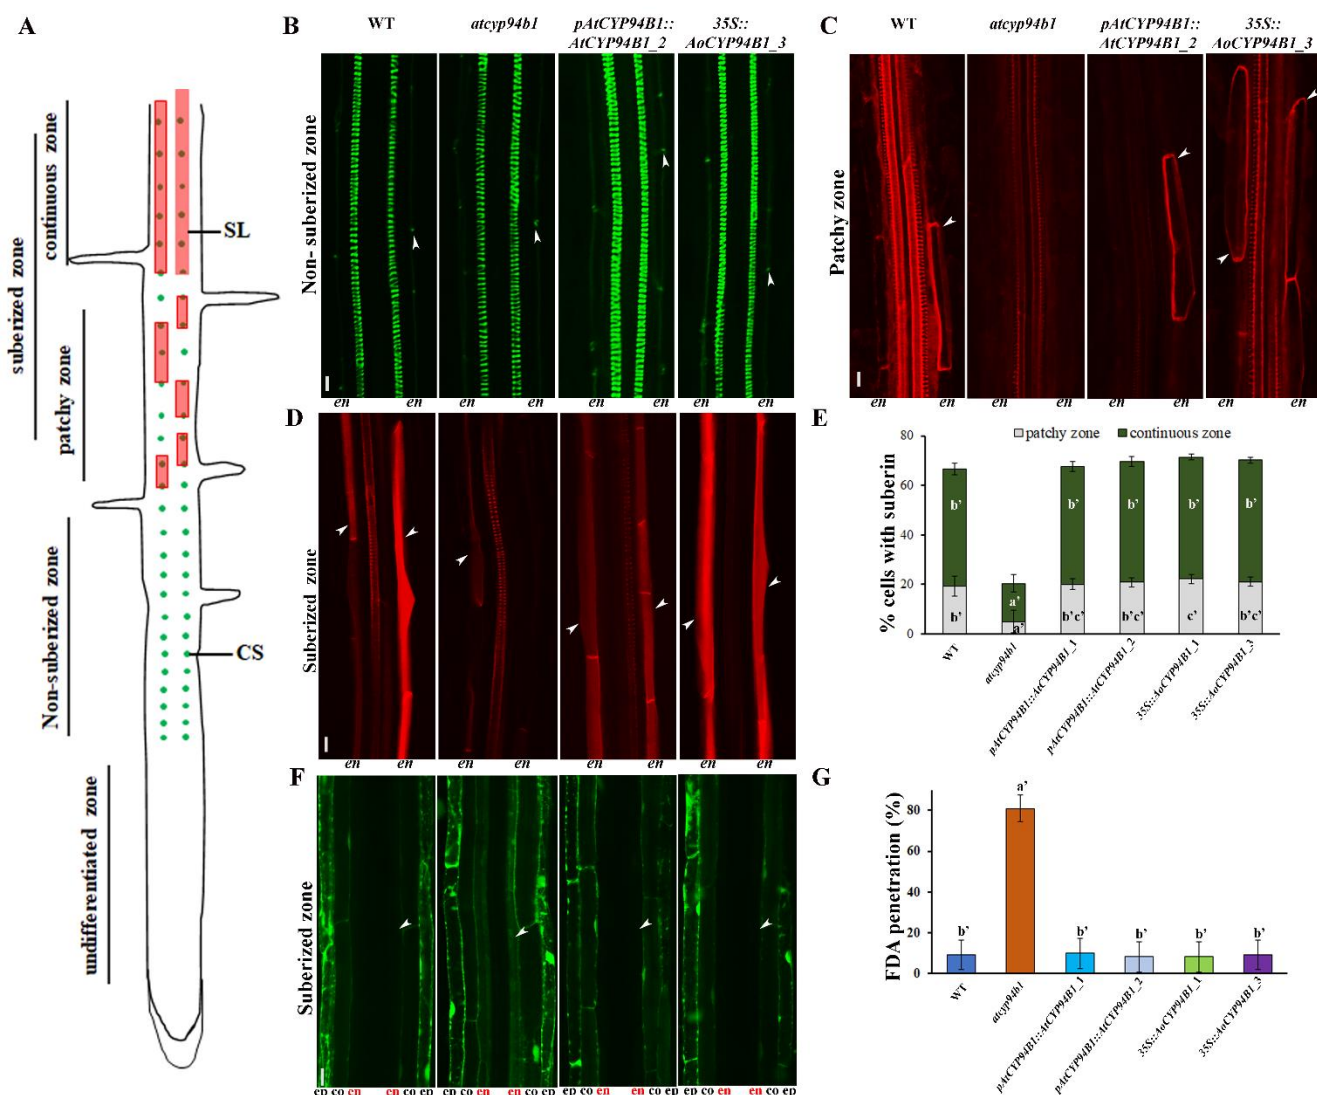

**Figure 6**

**CYP94B1 is involved in apoplastic barrier (SL) formation in *Arabidopsis* roots:** For root anatomical studies, one-week-old *Arabidopsis* seedlings grown on MS agar plates were used. Images were taken from similar parts of the WT, *atcyp94b1*, *pAtCYP94B1::AtCYP94B1* and *35S::AoCYP94B1* stained roots. Seedlings were stained with Auramin O to visualize CSs, and with Nile Red to view SL. Suberin patterns were counted as described in materials and methods. (A) Schematic of endodermal differentiation (adapted from Barberon et al., 2016). Three different zones are shown: undifferentiated, non-suberized, and suberized zone (patchy and continuous zones are distinguished). (B) Representative images showing CSs in the endodermis of non-suberized zones of roots. (C, D) Images showing SL deposition in the endodermal cells of patchy and continuous suberized zones of roots. (E) Percentage of endodermal cells with SL in the suberized zones. n=10 seedlings. (F) FDA penetration after 1 min in the suberized root zones of WT, *atcyp94b1*, *pAtCYP94B1::AtCYP94B1* and *35S::AoCYP94B1*. (G) Percentage of endodermal cells with FDA penetration in the suberized zone. ep: epidermis, co: cortex, en: endodermis (in red). Arrowheads indicate the location of CS and SL, except in F where arrowheads show the endodermis, Scale bar=10 μm. Different letters indicate statistically significant differences between genotypes as determined by the ANOVA employing the Tukey-Kramer posthoc test ( $P<0.01$ ). Same letters indicate no statistical difference between them.



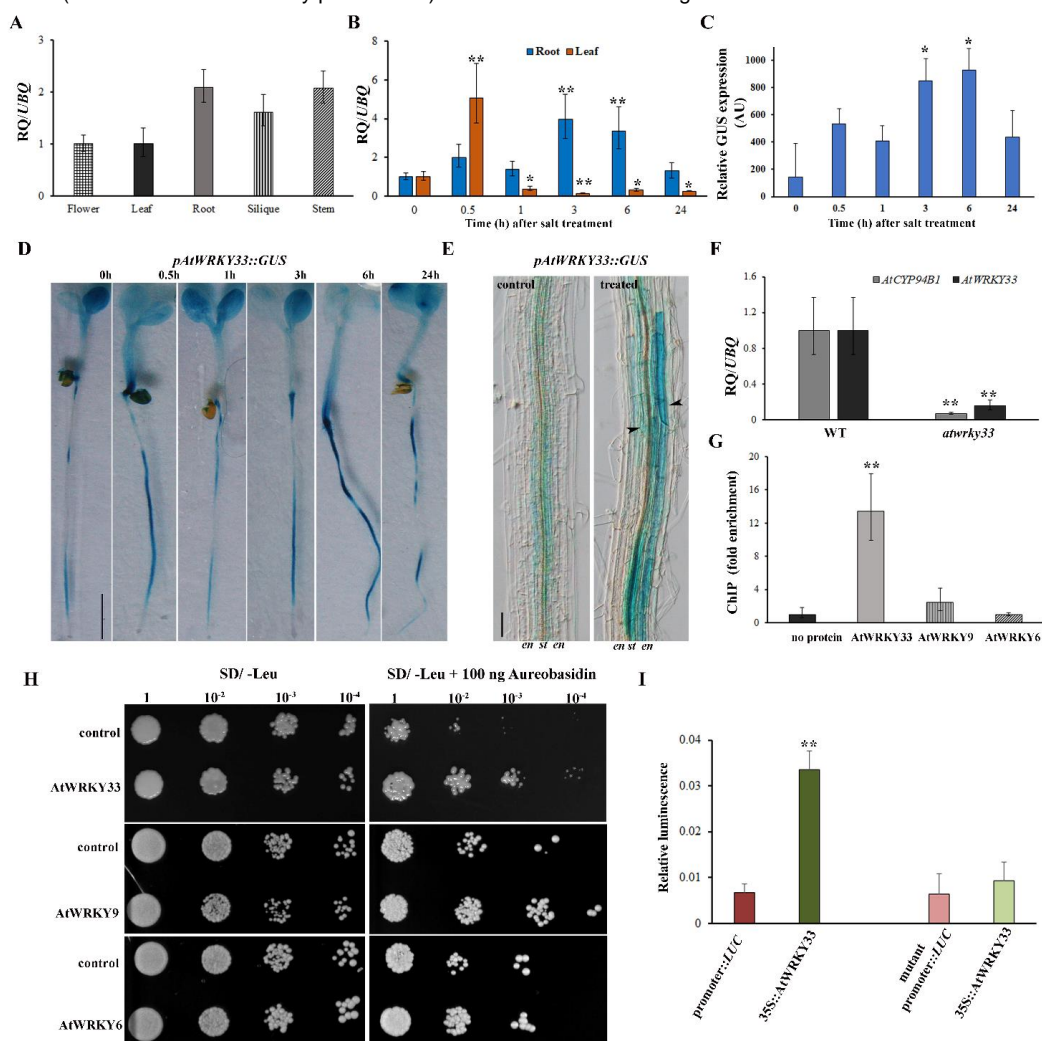

**Figure 7**

**AtWRKY33 transcription factor acts as an upstream regulator of AtCYP94B1:** (A-B) Gene expression analyses by qRT-PCR of *AtWRKY33* in one-week-old *Arabidopsis* seedlings. (A) Tissue-specific expression, (B) temporal expression in roots and leaves after 50 mM NaCl treatment for varying time periods. (C) Relative quantification and (D) *pAtWRKY33::GUS* expression analysis in one-week-old seedling roots upon 50 mM NaCl treatment. Scale bar=500  $\mu$ m. Asterisks indicate statistically significant differences (\*= $P < 0.05$ , \*\*= $P < 0.01$ ) between 0 h and other time points as measured by Student's *t*-test. (E) Root endodermal cells showing *pAtWRKY33::GUS* expression in control and salt-treated (50 mM NaCl for 6 h) one-week-old *Arabidopsis* seedlings, scale bar=100  $\mu$ m. Arrowheads show endodermal cells. (F) Suppression in the transcript levels of *AtCYP94B1* in *atwrky33* T-DNA insertional mutant roots compared to WT. Asterisks indicate statistically significant differences (\*\*= $P < 0.01$ ) between WT and *atwrky33* mutant as measured by Student's *t*-test. (G) Chromatin immunoprecipitation (ChIP)-qPCR of HA-tagged AtWRKY33 in *Arabidopsis* protoplasts, AtWRKY6 and AtWRKY9 were used as negative controls. Fold change in the enrichment of promoter fragments compared to no protein control are plotted. qRT-PCR data represent means  $\pm$  SD from 3 biological replicates each with 3 technical replicates. Asterisks indicate statistically significant differences (\*\*= $P < 0.01$ ) between no protein control and AtWRKY33 as measured by Student's *t*-test. (H) Yeast one-hybrid assay showing regulation of *AtCYP94B1* by AtWRKY33. AtWRKY6 and AtWRKY9 were used as additional controls. The representative growth status of yeast cells is shown on SD/-Leu agar medium with or without 100 ng of aureobasidin A. Numbers on the top of each photograph indicate relative densities of the cells 4 days post-inoculation. (I) Luciferase assay was carried out using the mesophyll protoplasts obtained from the leaves of 4-week-old *atwrky33* mutants. The *pAtCYP94B1::LUC* was used as the control and 35S::AtWRKY33 was used as the test. *AtCYP94B1* promoter fragment with mutated WRKY binding sites was used as additional control. Firefly luciferase activity was normalized to Renilla luciferase activity and plotted. Data represent mean  $\pm$  SD of four independent biological replicates each with three technical replicates. Asterisks indicate statistically significant differences (\*\*= $P < 0.01$ ) as measured by Student's *t*-test between the control and the test.

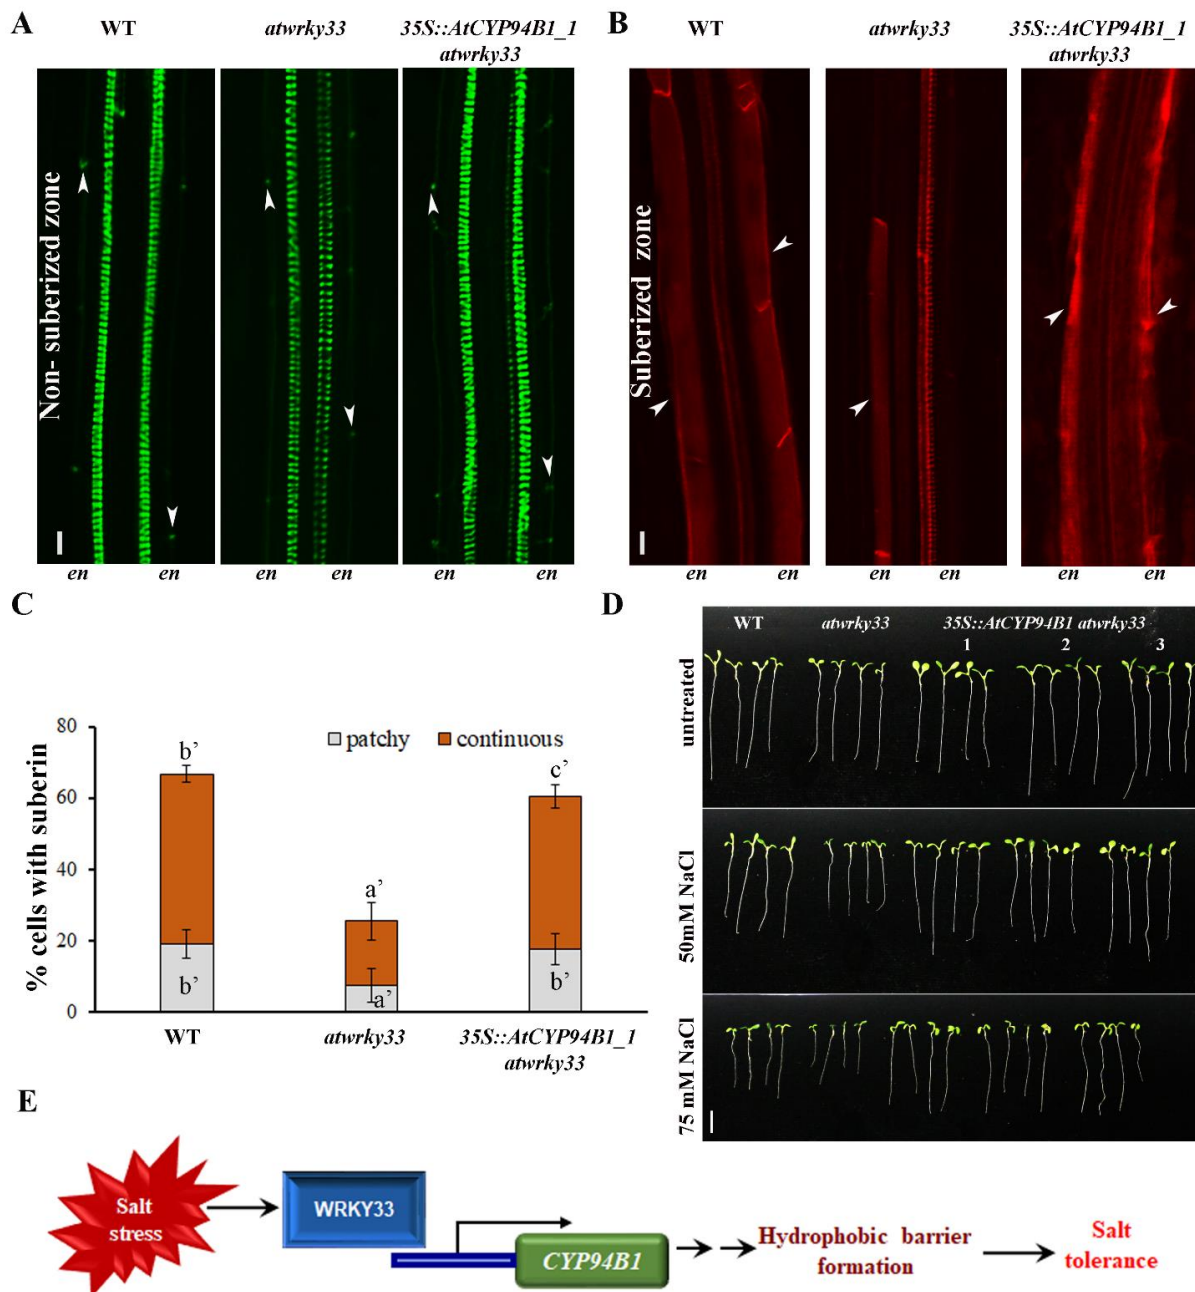

**Figure 8**

**AtWRKY33 regulates apoplastic barrier formation via *AtCYP94B1*:** For root anatomical studies, one-week-old WT, *atwrky33* mutants and *35S::AtCYP94B1\_1 atwrky33* (in the *atwrky33* mutant background) *Arabidopsis* seedlings grown on MS agar plates were used. Images of stained roots were taken from the same regions for all the genotypes. For visualizing CSs, seedlings were stained with Auramin O, while they were stained with Nile Red to view SL. Suberin patterns were counted as described in materials and methods. (A) Representative images showing Casparian strip development in the non-suberized endodermal cells of all three genotypes. (B) SL deposition in the suberized endodermal cells of all three genotypes. (C) Percentage of endodermal cells with SL in the suberized zones of the roots. Arrowheads indicate the location of CS and SL, n=10 seedlings, Scale bar=10  $\mu$ m. Different letters indicate statistically significant differences between genotypes as determined by the ANOVA employing the Tukey-Kramer posthoc test ( $P < 0.01$ ). Same letters indicate no statistical difference between them. (D) Comparison of seedling growth among WT, *atwrky33* mutant and three independent lines of *35S::AtCYP94B1\_1 atwrky33* ectopic expression lines. Surface sterilized and cold stratified seeds were sown on MS agar plates with or without NaCl (50 and 75 mM). Photographs were taken at the end of one week after germination. Scale bar=10 mm. en: endodermis. (E) Proposed model based on our data showing regulation of root apoplastic barrier formation by WRKY33 through controlling *CYP94B1* leading to salt tolerance.

## Parsed Citations

**Agarwal P, Dabi M, Agarwal PK (2014) Molecular cloning and characterization of a group II WRKY transcription factor from *Jatropha curcas*, an important biofuel crop. *DNA Cell Biology* 33: 503-513**

Pubmed: [Author and Title](#)

Google Scholar: [Author Only Title Only Author and Title](#)

**Alonso JM, Stepanova AN, Leisse TJ, Kim CJ, Chen H, Shinn P, Stevenson DK, Zimmerman J, Barajas P, Cheuk R, Gadrinab C, Heller C, Jeske A, Koesema E, Meyers CC, Parker H, Prednis L, Ansari Y, Choy N, Deen H, Geralt M, Hazari N, Hom E, Karnes M, Mulholland C, Ndubaku R, Schmidt I, Guzman P, Aguilar-Henonin L, Schmid M, Weigel D, Carter DE, Marchand T, Risseuw E, Brogden D, Zeko A, Crosby WL, Berry CC, Ecker JR (2003) Genome-wide insertional mutagenesis of *Arabidopsis thaliana*. *Science* 301: 653-657**

Pubmed: [Author and Title](#)

Google Scholar: [Author Only Title Only Author and Title](#)

**Andersen TG, Barberon M, Geldner N (2015) Suberization - the second life of an endodermal cell. *Current Opinion in Plant Biology* 28: 9-15**

Pubmed: [Author and Title](#)

Google Scholar: [Author Only Title Only Author and Title](#)

**Arnon DI (1949) Copper Enzymes in Isolated Chloroplasts. Polyphenoloxidase in *Beta Vulgaris*. *Plant Physiology* 24: 1-15**

Pubmed: [Author and Title](#)

Google Scholar: [Author Only Title Only Author and Title](#)

**Aubert Y, Widemann E, Miesch L, Pinot F, Heitz T (2015) CYP94-mediated jasmonoyl-isoleucine hormone oxidation shapes jasmonate profiles and attenuates defence responses to *Botrytis cinerea* infection. *Journal of Experimental Botany* 66: 3879-3892**

Pubmed: [Author and Title](#)

Google Scholar: [Author Only Title Only Author and Title](#)

**Bai Y, Sunarti S, Kissoudis C, Visser RGF, van der Linden CG (2018) The role of tomato WRKY genes in plant responses to combined abiotic and biotic stresses. *Frontiers in Plant Science* 9: 801**

Pubmed: [Author and Title](#)

Google Scholar: [Author Only Title Only Author and Title](#)

**Bakshi M, Oelmüller R (2014) WRKY transcription factors: Jack of many trades in plants. *Plant Signaling & Behavior* 9: e27700, doi: 10.4161/psb.27700.**

Pubmed: [Author and Title](#)

Google Scholar: [Author Only Title Only Author and Title](#)

**Barberon M (2017) The endodermis as a checkpoint for nutrients. *New Phytologist* 213: 1604-1610**

Pubmed: [Author and Title](#)

Google Scholar: [Author Only Title Only Author and Title](#)

**Barberon M, Vermeer JE, De Bellis D, Wang P, Naseer S, Andersen TG, Humbel BM, Nawrath C, Takano J, Salt DE, Geldner N (2016) Adaptation of root function by nutrient-induced plasticity of endodermal differentiation. *Cell* 164: 447-459**

Pubmed: [Author and Title](#)

Google Scholar: [Author Only Title Only Author and Title](#)

**Benveniste I, Saito T, Wang Y, Kandel S, Huang H, Pinot F, A Kahn R, Salaun J, Shimoji M (2006) Evolutionary relationship and substrate specificity of *Arabidopsis thaliana* fatty acid omega-hydroxylase. *Plant Science* 170: 326-338**

Pubmed: [Author and Title](#)

Google Scholar: [Author Only Title Only Author and Title](#)

**Bernards MA, Summerhurst DK, Razem FA (2004) Oxidases, peroxidases and hydrogen peroxide: the suberin connection. *Phytochemistry Reviews* 3: 113-142**

Pubmed: [Author and Title](#)

Google Scholar: [Author Only Title Only Author and Title](#)

**Birkenbihl RP, Kracher B, Roccaro M, Somssich IE (2017) Induced genome-wide binding of three *Arabidopsis* WRKY transcription factors during early MAMP-triggered immunity. *Plant Cell* 29: 20-38**

Pubmed: [Author and Title](#)

Google Scholar: [Author Only Title Only Author and Title](#)

**Bruckhoff V, Haroth S, Feussner K, König S, Brodhun F, Feussner I (2016) Functional characterization of CYP94-genes and identification of a novel jasmonate catabolite in flowers. *PLoS One* 11: e0159875, doi: 10.1371/journal.pone.0159875**

Pubmed: [Author and Title](#)

Google Scholar: [Author Only Title Only Author and Title](#)

**Brundrett MC, Kendrick B, Peterson CA (1991) Efficient lipid staining in plant material with Sudan red 7B or Fluorol yellow 088 in polyethylene glycol-glycerol. *Biotechnic and Histochemistry* 66: 111-116**

Pubmed: [Author and Title](#)

Google Scholar: [Author Only Title Only Author and Title](#)

**Chen J, Nolan TM, Ye H, Zhang M, Tong H, Xin P, Chu J, Chu C, Li Z, Yin Y (2017) *Arabidopsis* WRKY46, WRKY54, and WRKY70 transcription factors are involved in brassinosteroid-regulated plant growth and drought responses. *Plant Cell* 29: 1425-1439**

Pubmed: [Author and Title](#)

Google Scholar: [Author Only Title Only Author and Title](#)

**Chen T, Cai X, Wu X, Karahara I, Schreiber L, Lin J (2011) Casparian strip development and its potential function in salt tolerance. *Plant Signaling & Behavior* 6: 1499-1502**

Pubmed: [Author and Title](#)

Google Scholar: [Author Only Title Only Author and Title](#)

**Chu X, Wang C, Chen X, Lu W, Li H, Wang X, Hao L, Guo X (2015) The cotton WRKY Gene GhWRKY41 positively regulates salt and drought stress tolerance in transgenic *Nicotiana benthamiana*. *PLoS One* 10: e0143022, doi 10.1371/journal.pone.0143022.**

Pubmed: [Author and Title](#)

Google Scholar: [Author Only Title Only Author and Title](#)

**Clough SJ, Bent AF (1998) Floral dip: a simplified method for *Agrobacterium*-mediated transformation of *Arabidopsis thaliana*. *Plant Journal* 16: 735-743**

Pubmed: [Author and Title](#)

Google Scholar: [Author Only Title Only Author and Title](#)

**Cohen H, Fedyuk V, Wang C, Wu S, Aharoni A (2020) SUBERMAN regulates developmental suberization of the *Arabidopsis* root endodermis. *Plant Journal* 102: 431-447**

Pubmed: [Author and Title](#)

Google Scholar: [Author Only Title Only Author and Title](#)

**Compagnon V, Diehl P, Benveniste I, Meyer D, Schaller H, Schreiber L, Franke R, Pinot F (2009) CYP86B1 is required for very long chain omega-hydroxyacid and alpha, omega -dicarboxylic acid synthesis in root and seed suberin polyester. *Plant Physiology* 150: 1831-1843**

Pubmed: [Author and Title](#)

Google Scholar: [Author Only Title Only Author and Title](#)

**Dellaporta SL, Wood J, Hicks JB (1983) Plant DNA miniprep: version II. *Plant Molecular Biology Reports* 1: 19-21**

Pubmed: [Author and Title](#)

Google Scholar: [Author Only Title Only Author and Title](#)

**Enstone DE, Peterson CA, Ma FS (2003) Root endodermis and exodermis: structure, function, and responses to the environment. *Journal of Plant Growth Regulation* 21: 335-351**

Pubmed: [Author and Title](#)

Google Scholar: [Author Only Title Only Author and Title](#)

**Franke R, Briesen I, Wojciechowski T, Faust A, Yephremov A, Nawrath C, Schreiber L (2005) Apoplastic polyesters in *Arabidopsis* surface tissues—a typical suberin and a particular cutin. *Phytochemistry* 66: 2643-2658**

Pubmed: [Author and Title](#)

Google Scholar: [Author Only Title Only Author and Title](#)

**Franke R, Hofer R, Briesen I, Emsermann M, Efremova N, Yephremov A, Schreiber L (2009) The DAISY gene from *Arabidopsis* encodes a fatty acid elongase condensing enzyme involved in the biosynthesis of aliphatic suberin in roots and the chalaza-micropyle region of seeds. *Plant Journal* 57: 80-95**

Pubmed: [Author and Title](#)

Google Scholar: [Author Only Title Only Author and Title](#)

**Franke R, Schreiber L (2007) Suberin—a biopolyester forming apoplastic plant interfaces. *Current Opinion in Plant Biology* 10: 252-259**

Pubmed: [Author and Title](#)

Google Scholar: [Author Only Title Only Author and Title](#)

**Franke RB, Dombrink I, Schreiber L (2012) Suberin goes genomics: use of a short living plant to investigate a long lasting polymer. *Frontiers in Plant Science* 3: 4**

Pubmed: [Author and Title](#)

Google Scholar: [Author Only Title Only Author and Title](#)

**Gou M, Hou G, Yang H, Zhang X, Cai Y, Kai G, Liu CJ (2017) The MYB107 transcription factor positively regulates suberin biosynthesis. *Plant Physiology* 173: 1045-1058**

Pubmed: [Author and Title](#)

Google Scholar: [Author Only Title Only Author and Title](#)

**Graca J (2015) Suberin: the biopolyester at the frontier of plants. *Frontiers in Chemistry* 3: 62**

Pubmed: [Author and Title](#)

Google Scholar: [Author Only Title Only Author and Title](#)

**Hazman M, Sühnel M, Schäfer S, Zumsteg J, Lesot A, Beltran F, Marquis V, Herrgott L, Miesch L, Riemann M, Heitz T (2019) Characterization of jasmonoyl-isoleucine (JA-Ile) hormonal catabolic pathways in rice upon wounding and salt stress. *Open access: 1-14***

Pubmed: [Author and Title](#)

Google Scholar: [Author Only Title Only Author and Title](#)

**He GH, Xu JY, Wang YX, Liu JM, Li PS, Chen M, Ma YZ, Xu ZS (2016) Drought-responsive WRKY transcription factor genes TaWRKY1 and TaWRKY33 from wheat confer drought and/or heat resistance in *Arabidopsis*. *BMC Plant Biology* 16: 116**



Pubmed: [Author and Title](#)

Google Scholar: [Author Only Title Only Author and Title](#)

**Hofer R, Briesen I, Beck M, Pinot F, Schreiber L, Franke R (2008) The Arabidopsis cytochrome P450 CYP86A1 encodes a fatty acid omega-hydroxylase involved in suberin monomer biosynthesis. Journal of Experimental Botany 59: 2347-2360**

Pubmed: [Author and Title](#)

Google Scholar: [Author Only Title Only Author and Title](#)

**Iwata Y, Lee MH, Koizumi N (2011) Analysis of a transcription factor using transient assay in Arabidopsis protoplasts. Methods in Molecular Biology 754: 107-117**

Pubmed: [Author and Title](#)

Google Scholar: [Author Only Title Only Author and Title](#)

**Jiang Y, Deyholos MK (2009) Functional characterization of Arabidopsis NaCl-inducible WRKY25 and WRKY33 transcription factors in abiotic stresses. Plant Molecular Biology 69: 91-105**

Pubmed: [Author and Title](#)

Google Scholar: [Author Only Title Only Author and Title](#)

**Kamiya T, Borghi M, Wang P, Danku JM, Kalmbach L, Hosmani PS, Naseer S, Fujiwara T, Geldner N, Salt DE (2015) The MYB36 transcription factor orchestrates Casparian strip formation. Proceedings of the National Academy of Sciences USA 112: 10533-10538**

Pubmed: [Author and Title](#)

Google Scholar: [Author Only Title Only Author and Title](#)

**Kolattukudy PE (1984) Biochemistry and function of cutin and suberin. Canadian Journal of Botany 62: 2918-2933**

Pubmed: [Author and Title](#)

Google Scholar: [Author Only Title Only Author and Title](#)

**Koo AJ, Cooke TF, Howe GA (2011) Cytochrome P450 CYP94B3 mediates catabolism and inactivation of the plant hormone jasmonoyl-L-isoleucine. Proceedings of the National Academy of Sciences USA 108: 9298-9303**

Pubmed: [Author and Title](#)

Google Scholar: [Author Only Title Only Author and Title](#)

**Koo AJ, Thireault C, Zemelis S, Poudel AN, Zhang T, Kitaoka N, Brandizzi F, Matsuura H, Howe GA (2014) Endoplasmic reticulum-associated inactivation of the hormone jasmonoyl-L-isoleucine by multiple members of the cytochrome P450 94 family in Arabidopsis. Journal of Biological Chemistry 289: 29728-29738**

Pubmed: [Author and Title](#)

Google Scholar: [Author Only Title Only Author and Title](#)

**Kosma DK, Murmu K, Razeq FM, Santos P, Bourgault R, Molina I, Rowland O (2014) AtMYB41 activates ectopic suberin synthesis and assembly in multiple plant species and cell types. Plant Journal 80: 216-229**

Pubmed: [Author and Title](#)

Google Scholar: [Author Only Title Only Author and Title](#)

**Kreszies T, Schreiber L, Ranathunge K (2018) Suberized transport barriers in Arabidopsis, barley and rice roots: From the model plant to crop species. Journal of Plant Physiology 227: 75-83**

Pubmed: [Author and Title](#)

Google Scholar: [Author Only Title Only Author and Title](#)

**Krishnamurthy P, Jyothi-Prakash PA, Qin L, He J, Lin Q, Loh CS, Kumar PP (2014) Role of root hydrophobic barriers in salt exclusion of a mangrove plant *Avicennia officinalis*. Plant, Cell and Environment 37: 1656-1671**

Pubmed: [Author and Title](#)

Google Scholar: [Author Only Title Only Author and Title](#)

**Krishnamurthy P, Mohanty B, Wijaya E, Lee DY, Lim TM, Lin Q, Xu J, Loh CS, Kumar PP (2017) Transcriptomics analysis of salt stress tolerance in the roots of the mangrove *Avicennia officinalis*. Scientific Reports 7: 10031**

Pubmed: [Author and Title](#)

Google Scholar: [Author Only Title Only Author and Title](#)

**Krishnamurthy P, Ranathunge K, Franke R, Prakash HS, Schreiber L, Mathew MK (2009) The role of root apoplastic transport barriers in salt tolerance of rice (*Oryza sativa* L.). Planta 230: 119-134**

Pubmed: [Author and Title](#)

Google Scholar: [Author Only Title Only Author and Title](#)

**Krishnamurthy P, Ranathunge K, Nayak S, Schreiber L, Mathew MK (2011) Root apoplastic barriers block Na<sup>+</sup> transport to shoots in rice (*Oryza sativa* L.). Journal of Experimental Botany 62: 4215-4228**

Pubmed: [Author and Title](#)

Google Scholar: [Author Only Title Only Author and Title](#)

**Kronzucker HJ, Britto DT (2011) Sodium transport in plants: a critical review. New Phytologist 189: 54-81**

Pubmed: [Author and Title](#)

Google Scholar: [Author Only Title Only Author and Title](#)

**Kurotani K, Hayashi K, Hatanaka S, Toda Y, Ogawa D, Ichikawa H, Ishimaru Y, Tashita R, Suzuki T, Ueda M, Hattori T, Takeda S (2015) Elevated levels of CYP94 family gene expression alleviate the jasmonate response and enhance salt tolerance in rice. Plant and Cell Physiology 56: 779-789**

Pubmed: [Author and Title](#)

Google Scholar: [Author Only Title Only Author and Title](#)

**Li P, Yu Q, Gu X, Xu C, Qi S, Wang H, Zhong F, Baskin TI, Rahman A, Wu S (2018) Construction of a functional Casparian strip in non-endodermal lineages is orchestrated by two parallel signaling systems in Arabidopsis thaliana. Current Biology 28: 2777-2786 e2772**

Pubmed: [Author and Title](#)

Google Scholar: [Author Only Title Only Author and Title](#)

**Liang QY, Wu YH, Wang K, Bai ZY, Liu QL, Pan YZ, Zhang L, Jiang BB (2017) Chrysanthemum WRKY gene DgWRKY5 enhances tolerance to salt stress in transgenic chrysanthemum. Scientific Reports 7: 4799**

Pubmed: [Author and Title](#)

Google Scholar: [Author Only Title Only Author and Title](#)

**Lunde C, Kimberlin A, Leiboff S, Koo AJ, Hake S (2019) Tasselseed5 overexpresses a wound-inducible enzyme, ZmCYP94B1, that affects jasmonate catabolism, sex determination, and plant architecture in maize. Communications Biology 2: 114**

Pubmed: [Author and Title](#)

Google Scholar: [Author Only Title Only Author and Title](#)

**Ma FS, Peterson CA (2003) Current insights into the development, structure and chemistry of the endodermis and exodermis of roots. Canadian Journal of Botany 81: 405-421**

Pubmed: [Author and Title](#)

Google Scholar: [Author Only Title Only Author and Title](#)

**Mahalingam R, Gomez-Buitrago A, Eckardt N, Shah N, Guevara-Garcia A, Day P, Raina R, Fedoroff NV (2003) Characterizing the stress/defense transcriptome of Arabidopsis. Genome Biology 4: R20, doi:10.1186/gb-2003-4-3-r20**

Pubmed: [Author and Title](#)

Google Scholar: [Author Only Title Only Author and Title](#)

**Narusaka Y, Narusaka M, Seki M, Umezawa T, Ishida J, Nakajima M, Enju A, Shinozaki K (2004) Crosstalk in the responses to abiotic and biotic stresses in Arabidopsis: analysis of gene expression in cytochrome P450 gene superfamily by cDNA microarray. Plant Molecular Biology 55: 327-342**

Pubmed: [Author and Title](#)

Google Scholar: [Author Only Title Only Author and Title](#)

**Naseer S, Lee Y, Lapiere C, Franke R, Nawrath C, Geldner N (2012) Casparian strip diffusion barrier in Arabidopsis is made of a lignin polymer without suberin. Proceedings of the National Academy of Sciences of the USA 109: 10101-10106**

Pubmed: [Author and Title](#)

Google Scholar: [Author Only Title Only Author and Title](#)

**Nawrath C, Schreiber L, Franke RB, Geldner N, Reina-Pinto JJ, Kunst L (2013) Apoplastic diffusion barriers in Arabidopsis, Vol 11. American Society of Plant Biologists, doi: 10.1199/tab.0167**

Pubmed: [Author and Title](#)

Google Scholar: [Author Only Title Only Author and Title](#)

**Okay S, Derelli E, Unver T (2014) Transcriptome-wide identification of bread wheat WRKY transcription factors in response to drought stress. Molecular Genetics and Genomics 289: 765-781**

Pubmed: [Author and Title](#)

Google Scholar: [Author Only Title Only Author and Title](#)

**Parida AK, Das AB (2005) Salt tolerance and salinity effects on plants: a review. Ecotoxicology and Environmental Safety 60: 324-349**

Pubmed: [Author and Title](#)

Google Scholar: [Author Only Title Only Author and Title](#)

**Pinot F, Beisson F (2011) Cytochrome P450 metabolizing fatty acids in plants: characterization and physiological roles. FEBS Journal 278: 195-205**

Pubmed: [Author and Title](#)

Google Scholar: [Author Only Title Only Author and Title](#)

**Ranathunge K, Lin J, Steudle E, Schreiber L (2011a) Stagnant deoxygenated growth enhances root suberization and lignifications, but differentially affects water and NaCl permeabilities in rice (Oryza sativa L.) roots. Plant, Cell and Environment 34: 1223-1240**

Pubmed: [Author and Title](#)

Google Scholar: [Author Only Title Only Author and Title](#)

**Ranathunge K, Schreiber L (2011b) Water and solute permeabilities of Arabidopsis roots in relation to the amount and composition of aliphatic suberin. Journal of Experimental Botany 62: 1961-1974**

Pubmed: [Author and Title](#)

Google Scholar: [Author Only Title Only Author and Title](#)

**Ranathunge K, Schreiber L, Franke R (2011c) Suberin research in the genomics era-new interest for an old polymer. Plant Science 180: 399-413**

Pubmed: [Author and Title](#)

Google Scholar: [Author Only Title Only Author and Title](#)

**Ranathunge K, Steudle E, Lafitte R (2005) Blockage of apoplastic bypass-flow of water in rice roots by insoluble salt precipitates analogous to a Pfeffer cell. Plant, Cell and Environment 28: 121-133**



Pubmed: [Author and Title](#)

Google Scholar: [Author Only Title Only Author and Title](#)

**Ranathunge K, Thomas RH, Fang X, Peterson CA, Gijzen M, Bernards MA (2008) Soybean root suberin and partial resistance to root rot caused by *Phytophthora sojae*. *Phytopathology* 98: 1179-1189**

Pubmed: [Author and Title](#)

Google Scholar: [Author Only Title Only Author and Title](#)

**Sarris PF, Duxbury Z, Huh SU, Ma Y, Segonzac C, Sklenar J, Derbyshire P, Cevik V, Rallapalli G, Saucet SB, Wirthmueller L, Menke FLH, Sohn KH, Jones JDG (2015) A Plant immune receptor detects pathogen effectors that target WRKY transcription factors. *Cell* 161: 1089-1100**

Pubmed: [Author and Title](#)

Google Scholar: [Author Only Title Only Author and Title](#)

**Scholander PF (1968) How mangroves desalinate water. *Physiologia Plantarum* 21: 251-261**

Pubmed: [Author and Title](#)

Google Scholar: [Author Only Title Only Author and Title](#)

**Schreiber L, Franke BR (2011) Endodermis and exodermis in roots. In. John Wiley & Sons, Ltd, Chichester, doi: 10.1002/9780470015902.a0002086.pub2**

Pubmed: [Author and Title](#)

Google Scholar: [Author Only Title Only Author and Title](#)

**Schreiber L, Hartmann K, Skrabs M, Zeier J (1999) Apoplastic barriers in roots: chemical composition of endodermal and hypodermal cell walls *Journal of Experimental Botany* 50: 1267-1280**

Pubmed: [Author and Title](#)

Google Scholar: [Author Only Title Only Author and Title](#)

**Song H, Wang P, Hou L, Zhao S, Zhao C, Xia H, Li P, Zhang Y, Bian X, Wang X (2016) Global Analysis of WRKY Genes and Their Response to Dehydration and Salt Stress in Soybean. *Frontiers in Plant Science* 7: 9**

Pubmed: [Author and Title](#)

Google Scholar: [Author Only Title Only Author and Title](#)

**Toki S, Hara N, Ono K, Onodera H, Tagiri A, Oka S, Tanaka H (2006) Early infection of scutellum tissue with *Agrobacterium* allows high-speed transformation of rice. *Plant Journal* 47: 969-976**

Pubmed: [Author and Title](#)

Google Scholar: [Author Only Title Only Author and Title](#)

**Ursache R, Andersen TG, Marhavy P, Geldner N (2018) A protocol for combining fluorescent proteins with histological stains for diverse cell wall components. *Plant Journal* 93: 399-412**

Pubmed: [Author and Title](#)

Google Scholar: [Author Only Title Only Author and Title](#)

**Widemann E, Smirnova E, Aubert Y, Miesch L, Heitz T (2016) Dynamics of jasmonate metabolism upon flowering and across leaf stress responses in *Arabidopsis thaliana*. *Plants* 5: 1-15**

Pubmed: [Author and Title](#)

Google Scholar: [Author Only Title Only Author and Title](#)

**Wu M, Liu H, Han G, Cai R, Pan F, Xiang Y (2017) A moso bamboo WRKY gene PeWRKY83 confers salinity tolerance in transgenic *Arabidopsis* plants. *Scientific Reports* 7: 11721**

Pubmed: [Author and Title](#)

Google Scholar: [Author Only Title Only Author and Title](#)

**Wunderling A, Ripper D, Barra-Jimenez A, Mahn S, Sajak K, Targem MB, Ragni L (2018) A molecular framework to study periderm formation in *Arabidopsis*. *New Phytologist* 219: 216-229**

Pubmed: [Author and Title](#)

Google Scholar: [Author Only Title Only Author and Title](#)

**Xu YH, Wang JW, Wang S, Wang JY, Chen XY (2004) Characterization of GaWRKY1, a cotton transcription factor that regulates the sesquiterpene synthase gene -delta-cadinene synthase-A. *Plant Physiology* 135: 507-515**

Pubmed: [Author and Title](#)

Google Scholar: [Author Only Title Only Author and Title](#)

**Yeo AR, Yeo ME, Flowers TJ (1987) The contribution of an apoplastic pathway to sodium uptake by rice roots in saline conditions. *Journal of Experimental Botany* 38: 1141-1153**

Pubmed: [Author and Title](#)

Google Scholar: [Author Only Title Only Author and Title](#)

**Yoo SD, Cho YH, Sheen J (2007) *Arabidopsis* mesophyll protoplasts: a versatile cell system for transient gene expression analysis. *Nature Protocols* 2: 1565-1572**

Pubmed: [Author and Title](#)

Google Scholar: [Author Only Title Only Author and Title](#)

**Yoshida S, Forno DA, Cock JH (1971) Laboratory manual for physiological studies of rice. IRRI, Los. Banos, Philippines, 1-83**

Pubmed: [Author and Title](#)
